# Supplementary material
Source: ML conference proceedings conference paper supplement (https://openreview.net/forum?id=rSsc9uCVBl)
Supplement: supplementary_material [file supp.pdf › supp.pdf]

---

# Comparator-Adaptive $\Phi$ -Regret: Improved Bounds, Simpler Algorithms, and Applications to Games

---

Anonymous Author(s)

Affiliation

Address

email

## Abstract

In the classic expert problem,  $\Phi$ -regret measures the gap between the learner's total loss and that achieved by applying the best action transformation  $\phi \in \Phi$ . A recent work by [Lu et al. \[2025\]](#) introduces an adaptive algorithm whose regret against a comparator  $\phi$  depends on a certain sparsity-based complexity measure of  $\phi$ , (almost) recovering and interpolating optimal bounds for standard regret notions such as external, internal, and swap regret. In this work, we propose a general idea to achieve an even better comparator-adaptive  $\Phi$ -regret bound via much simpler algorithms compared to [Lu et al. \[2025\]](#). Specifically, we discover a prior distribution over all possible binary transformations and show that it suffices to achieve prior-dependent regret against these transformations. Then, we propose two concrete and efficient algorithms to achieve so, where the first one learns over multiple copies of a prior-aware variant of the Kernelized MWU algorithm of [Farina et al. \[2022b\]](#), and the second one learns over multiple copies of a prior-aware variant of the BM-reduction [[Blum and Mansour, 2007](#)]. To further showcase the power of our methods and the advantages over [[Lu et al., 2025](#)] besides the simplicity and better regret bounds, we also show that our second approach can be extended to the game setting to achieve accelerated and adaptive convergence rate to  $\Phi$ -equilibria for a class of general-sum games. When specified to the special case of correlated equilibria, our bound improves over the existing ones from [Anagnostides et al. \[2022a,b\]](#).

## 1 Introduction

Expert problem [[Freund and Schapire, 1997](#)] is one of the most fundamental online learning problems, where a learner repeatedly hedges over  $d$  experts with the goal of being comparative to a strong benchmark. More concretely, in each round  $t$ , the learner proposes a distribution  $p_t \in \Delta(d)$  over  $d$  experts and suffers loss  $\langle p_t, \ell_t \rangle$  where  $\ell_t \in [0, 1]^d$  is a loss vector decided by an adversary. Consider a benchmark that always applies a fixed linear transformation  $\phi : \Delta(d) \mapsto \Delta(d)$  to the learner's strategy and thus suffers loss  $\langle \phi(p_t), \ell_t \rangle$  in round  $t$ . The regret of the learner against  $\phi$  is then defined as  $\text{Reg}(\phi) \triangleq \sum_{t=1}^T \langle p_t - \phi(p_t), \ell_t \rangle$ , that is, the difference between the learner's total loss and that of the benchmark. Given a class of linear transformations  $\Phi$ , the learner's  $\Phi$ -regret is defined as  $\max_{\phi \in \Phi} \text{Reg}(\phi)$  [[Greenwald and Jafari, 2003](#)]. With an appropriate choice of  $\Phi$ , this general notion of  $\Phi$ -regret subsumes many well-studied regret notions in the literature, such as external regret, internal regret, and swap regret.

While the optimal  $\Phi$ -regret bound naturally depends on the complexity of the class  $\Phi$  and different algorithms have been proposed for different  $\Phi$ 's in the literature, a recent work by [Lu et al. \[2025\]](#) developed a comparator-adaptive algorithm whose regret against  $\phi$  depends on a certain sparsity-based complexity measure  $c_\phi$  of  $\phi$ , almost recovering the optimal regret bounds for external regret, internal

regret, and swap regret simultaneously via one single algorithm. Specifically, their algorithm achieves  $\text{Reg}(\phi) = \mathcal{O}\left(\sqrt{c_\phi(T+d)(\log d)^3}\right)$  for all  $\phi$  simultaneously, where  $c_\phi = \min\{d - d_\phi^{\text{self}}, d - d_\phi^{\text{unif}} + 1\}$ ,  $d_\phi^{\text{self}}$  is the number of experts that are mapped to themselves by  $\phi$ , and  $d_\phi^{\text{unif}}$  is the maximum number of experts mapped to the same expert by  $\phi$  (see [Section 2](#) for formal definitions). The design of their algorithm, however, is somewhat complicated and uses Haar-wavelet-inspired matrix features. In this work, we significantly improve over [Lu et al. \[2025\]](#) by *developing simpler algorithms, achieving better comparative-adaptive regret bounds, and demonstrating broader applications to accelerated convergence in games*. Specifically, our contributions are as follows.

- First, in [Section 3](#), we propose a general idea of achieving an improved comparator-adaptive regret bound  $\text{Reg}(\phi) = \mathcal{O}(\sqrt{c_\phi T \log d})$ , removing both the extra  $\tilde{\mathcal{O}}(\sqrt{c_\phi d})$  additive term and also the extra  $\log d$  factor compared to that of [Lu et al. \[2025\]](#). We achieve so by proposing a prior distribution  $\pi$  over all binary and linear transformations and showing that as long as a natural prior-dependent regret bound  $\text{Reg}(\phi) = \mathcal{O}(\sqrt{T \log(1/\pi(\phi))})$  holds, then the aforementioned new comparator-adaptive regret bound holds.
- While at first glance it is unclear at all how to achieve the prior-dependent regret bound above efficiently (since the number of all binary transformations is  $d^d$ ), we propose two efficient approaches to achieve so thanks to the special structure of our prior. For the first approach ([Section 4](#)), we utilize and extend the Kernelized Multiplicative Weight Update algorithm of [Farina et al. \[2022b\]](#) and show that a certain prior-dependent kernel can be computed efficiently; for the second approach ([Section 5](#)), we develop a prior-aware variant of the classic BM-reduction [[Blum and Mansour, 2007](#)] and learn over multiple copies of it. Both approaches are arguably much simpler than the algorithm of [Lu et al. \[2025\]](#).
- Besides its simplicity and better regret bounds, we further demonstrate the power of our second approach by extending it to an uncoupled learning dynamic for games and achieving accelerated and adaptive convergence to  $\Phi$ -equilibria ([Section 6](#)). Specifically, we develop an algorithm such that, when deployed by all players for a broad class of  $N$ -player general-sum games considered by [Anagnostides et al. \[2022c\]](#), each player enjoys a  $T$ -independent regret bound  $\text{Reg}(\phi) = \mathcal{O}(c_\phi N \log d + N^2 \log d)$  for all  $\phi$  simultaneously. Based on standard connection between  $\Phi$ -regret and  $\Phi$ -equilibria, this implies an adaptive  $(\max_{\phi \in \Phi} c_\phi N \log d + N^2 \log d)/T$  convergence rate to  $\Phi$ -equilibria, simultaneously for all classes  $\Phi$ , which is the first result of this kind to our knowledge. Moreover, when specified to the case of correlated equilibria (where  $\Phi$  is all binary linear transformations), we improve over [Anagnostides et al. \[2022b\]](#) on the  $d$ -dependence and remove any  $\text{polylog}(T)$  dependence compared to [Anagnostides et al. \[2022a,b\]](#) (although their results hold more generally for any general-sum games). Our technique is also new and relies on the flexibility and a particular structure of our second approach, which allows us to bound the path-length of the learning dynamic via showing small external regret. We remark that it is highly unclear (if possible at all) how to achieve similar results using the algorithm of [Lu et al. \[2025\]](#) (or even our first approach).

**Related Work** We refer the reader to [Cesa-Bianchi and Lugosi \[2006\]](#) for detailed discussions on external regret (e.g., [[Freund and Schapire, 1997](#)]), internal regret (e.g., [[Foster and Vohra, 1999](#), [Stoltz and Lugosi, 2005](#)]), and swap regret [[Blum and Mansour, 2007](#)], whose formal definition can be found in [Section 2](#). As mentioned, they all belong to the family of  $\Phi$ -regret, a concept proposed by [Greenwald and Jafari \[2003\]](#) and further studied in many subsequent works such as [Stoltz and Lugosi \[2007\]](#), [Gordon et al. \[2008\]](#), [Rakhlin et al. \[2011\]](#), [Piliouras et al. \[2022\]](#), [Bernasconi et al. \[2023\]](#), [Cai et al. \[2024\]](#), [Zhang et al. \[2024\]](#) due to its generality and connection to various equilibrium concepts. However, comparator-adaptive  $\Phi$ -regret bounds were only recently considered by [Lu et al. \[2025\]](#) as far as we know.

The concept of comparator-adaptive regret, nevertheless, is much older and has been studied under various different contexts; we refer the reader to [Orabona \[2019\]](#) for in-depth discussion. The algorithm of [Lu et al. \[2025\]](#) makes use of advances from this line of work [[Cutkosky, 2018](#)], while ours uses two simpler ideas: prior-dependent external regret via the classic Multiplicative Weight Update (MWU) algorithm [[Littlestone and Warmuth, 1994](#), [Freund and Schapire, 1997](#)] and combining multiple algorithms to learn over the learning rates via a meta MWU (an idea that has

been used in many prior works such as [Koolen et al. \[2014\]](#), [Van Erven and Koolen \[2016\]](#), [Foster et al. \[2017\]](#), [Cutkosky \[2019\]](#), [Bhaskara et al. \[2020\]](#), [Chen et al. \[2021\]](#)).

The connection between online learning and games dates back to [Blackwell \[1956\]](#), [Hannan \[1957\]](#), [Freund and Schapire \[1999\]](#). [Greenwald and Jafari \[2003\]](#) showed that in a general-sum game, if all players deploy an online learning algorithm with sublinear  $\Phi$ -regret, then the empirical distribution of their joint strategy profiles converges to a  $\Phi$ -equilibrium with the convergence rate being the average (over time)  $\Phi$ -regret. While  $\Phi$ -regret is usually of order  $\sqrt{T}$  in the worst case (leading to  $1/\sqrt{T}$  convergence rate), since the work of [Daskalakis et al. \[2011\]](#), [Rakhlin and Sridharan \[2013\]](#), [Syrkanis et al. \[2015\]](#), there has been a surge of research showing that accelerated convergence rate of order  $\text{polylog}(T)/T$  is possible in many cases by utilizing the structure of the game and certain optimistic online learning algorithms [[Daskalakis et al., 2021](#), [Anagnostides et al., 2022a,b](#), [Farina et al., 2022a](#)]. Our result in [Section 6](#) adds to the growing body of this line of work and is the first accelerated convergence rate that is also adaptive in the complexity of  $\Phi$ . Our approach also makes use of standard optimistic online learning algorithms, but existing analysis does not work directly due to various technical hurdles. We resolve them by exploiting a particular structure of our second algorithm, borrowing ideas from a two-layer framework of [Zhang et al. \[2022\]](#), and considering a subclass of games where the sum of all players' external regret is always nonnegative (a broad class as shown by [Anagnostides et al. \[2022c\]](#)).

## 2 Preliminaries

**General Notations** For a positive integer  $n$ , let  $[n]$  denote the set  $\{1, 2, \dots, n\}$ . Define  $\mathbb{R}_+^n$  to be the positive orthant of the  $n$ -dimensional Euclidean space, and  $\Delta(n) \triangleq \{p \in \mathbb{R}_+^n, \sum_{i=1}^n p_i = 1\}$  to be the  $(n-1)$ -dimensional simplex. Given a finite set  $S$ , denote  $|S|$  to be its cardinality and  $\Delta(S)$  to be the set of probability distributions over  $S$ . Given  $p, q \in \Delta(n)$ , define  $\text{KL}(p, q) \triangleq \sum_{i=1}^n p_i \log \frac{p_i}{q_i}$  as the KL-divergence between  $p$  and  $q$ . For a matrix  $M \in \mathbb{R}^{m \times n}$ , we denote by  $M_{i,:} \in \mathbb{R}^n$  the  $i$ -th row of  $M$  and  $M_{:,j} \in \mathbb{R}^m$  the  $j$ -th column of  $M$ . For two matrices  $M_1, M_2 \in \mathbb{R}^{m \times n}$ , define the inner product  $\langle M_1, M_2 \rangle \triangleq \text{trace}(M_1^\top M_2)$ . Let  $\mathbf{1}$  and  $\mathbf{0}$  be the all-one and all-zero vector in an appropriate dimension, let  $e_i$  be the one-hot vector in an appropriate dimension with the  $i$ -th entry being 1 and all other entries being 0, and let  $\mathbf{I}$  be the identity matrix in an appropriate dimension.

Define  $\mathcal{S} \triangleq \{\phi \in [0, 1]^{d \times d} \mid \phi_{k,:} \in \Delta(d), \forall k \in [d]\}$  as the set of all row-stochastic matrices, which is also the set of all possible linear transformations from  $\Delta(d)$  to  $\Delta(d)$  if we treat each  $\phi \in \mathcal{S}$  as a linear operator:  $\phi(p) = \phi^\top p$ . The subset  $\Phi_b \triangleq \{\phi \in \{0, 1\}^{d \times d} \mid \phi_{k,:} \in \Delta(d), \forall k \in [d]\} \subseteq \mathcal{S}$  consisting of all binary row-stochastic matrices is of particular interest. For a distribution  $\pi \in \Delta(\Phi_b)$ , we let  $\pi(\phi)$  be the probability mass of  $\phi \in \Phi_b$ .

**Expert Problem and  $\Phi$ -regret** In an expert problem, the interaction between the environment and the learner proceeds for  $T$  rounds. At each round  $t \in [T]$ , the learner decides a distribution  $p_t \in \Delta(d)$  over the  $d$  experts and the environment decides a loss vector  $\ell_t \in [0, 1]^d$ . The learner then receives  $\ell_t$  and suffers loss  $\langle p_t, \ell_t \rangle$ . Given a transformation  $\phi \in \mathcal{S}$ , the regret of the learner against this  $\phi$  is defined as  $\text{Reg}(\phi) \triangleq \sum_{t=1}^T \langle p_t - \phi(p_t), \ell_t \rangle$ , and given a class of transformations  $\Phi \subseteq \mathcal{S}$ , the  $\Phi$ -regret is defined as  $\text{Reg}(\Phi) \triangleq \max_{\phi \in \Phi} \text{Reg}(\phi)$  [[Greenwald and Jafari, 2003](#)].

With an appropriate choice of  $\Phi$ ,  $\Phi$ -regret reduces to many standard regret notions. For example, with  $\Phi = \Phi_{\text{Ext}} \triangleq \{\mathbf{1}e_i^\top\}_{i \in [d]}$ ,  $\Phi$ -regret recovers the standard *external regret* that competes with a fixed expert, and it is well known that the minimax bound in this case is  $\Theta(\sqrt{T \log d})$ , achieved by for example the classic Multiplicative Weight Update (MWU) algorithm [[Littlestone and Warmuth, 1994](#), [Freund and Schapire, 1997](#)]; with  $\Phi = \Phi_{\text{Int}} \triangleq \{\mathbf{I} - e_i e_i^\top + e_i e_j^\top\}_{i,j \in [d], i \neq j}$ ,  $\Phi$ -regret recovers *internal regret* and competes with a strategy that moves all the weights for expert  $i$  to expert  $j$  for some fixed  $i$  and  $j$ , and the minimax bound in this case is also  $\Theta(\sqrt{T \log d})$  [[Stoltz and Lugosi, 2005](#)]; and with  $\Phi = \Phi_b$ ,  $\Phi$ -regret reduces to *swap regret* and competes with all possible swaps between experts, and the minimax bound in this case is  $\Theta(\sqrt{dT \log d})$  [[Blum and Mansour, 2007](#), [Ito, 2020](#)] for a certain regime of  $T$  and  $d$ .<sup>1</sup>

<sup>1</sup>More concretely, for the regime where  $d \log d \lesssim T \lesssim d^{3/2}/(\log d)$ . For other regimes, see recent work by [Dagan et al. \[2024\]](#), [Peng and Rubinstein \[2024\]](#).

In a recent work by Lu et al. [2025], they derive a comparator-adaptive regret bound of the form  $\text{Reg}(\phi) = \mathcal{O}\left(\sqrt{c_\phi(T+d)}(\log d)^3\right)$  for all  $\phi \in \mathcal{S}$  simultaneously, where  $c_\phi$  is a certain sparsity-based complexity measure of  $\phi$ , formally defined as follows.

**Definition 2.1** (Complexity measure of  $\phi$  from Lu et al. [2025]). *For any  $\phi \in \Phi_b$ , define  $c_\phi \triangleq \min\{d - d_\phi^{\text{self}}, d - d_\phi^{\text{unif}} + 1\}$ , where  $d_\phi^{\text{self}}$ , the degree of self-map of  $\phi$ , is the number of experts  $i$  such that  $\phi(e_i) = e_i$  (equivalently,  $d_\phi^{\text{self}} = \text{trace}(\phi)$ ), and  $d_\phi^{\text{unif}}$ , the degree of uniformity of  $\phi$ , is the multiplicity of the most frequent element in the multi-set  $\{\phi(e_1), \dots, \phi(e_d)\}$ . For any  $\phi \in \mathcal{S} \setminus \Phi_b$ , define  $c_\phi \triangleq \min_{q \in Q_\phi} \mathbb{E}_{\phi' \sim q}[c_{\phi'}]$  where  $Q_\phi = \{q \in \Delta(\Phi_b) : \mathbb{E}_{\phi' \sim q}[\phi'] = \phi\}$ .*

Direct calculation shows that  $\max_{\phi \in \Phi_{\text{Ext}}} c_\phi = \max_{\phi \in \Phi_{\text{Int}}} c_\phi = 1$  and  $\max_{\phi \in \Phi_b} c_\phi = d$ , and thus their algorithm achieves almost optimal external regret, internal regret, and swap regret simultaneously.

We remark that, in fact, Lu et al. [2025] define  $c_\phi$  for  $\phi \in \mathcal{S} \setminus \Phi_b$  using the exact same definition as the case when  $\phi \in \Phi_b$ , which is rather unnatural and results in a discontinuous function over  $\mathcal{S}$  — for example, a slight perturbation for a  $\phi \in \Phi_b$  with a large  $d_\phi^{\text{self}}$  (and thus small  $c_\phi$ ) can lead to a  $\phi' \in \mathcal{S}$  with  $d_{\phi'}^{\text{self}} = 0$  (and thus potentially large  $c_{\phi'}$ ). The definition we use here, on the other hand, is a continuous and natural extension from  $\Phi_b$  to  $\mathcal{S}$ . It can be shown that our definition leads to a strictly smaller complexity measure; see Proposition A.1 in Appendix A for more discussion.

However, what is perhaps not realized by Lu et al. [2025] is that their bound  $\text{Reg}(\phi) = \mathcal{O}\left(\sqrt{c_\phi(T+d)}(\log d)^3\right)$  in fact also holds under our better definition of  $c_\phi$  (via the same algorithm). The reasoning is the same as our proof for Theorem 3.3: it suffices to show this bound for  $\phi \in \Phi_b$  and then take convex combination of the bound when dealing with  $\phi \in \mathcal{S} \setminus \Phi_b$ . This explains why we change the definition to this version.

One may wonder why we care about any  $\phi \in \mathcal{S} \setminus \Phi_b$  — after all, since the benchmark  $\sum_{t=1}^T \langle \phi(p_t), \ell_t \rangle$  is linear in  $\phi$ , the best  $\phi$  from a set  $\Phi$  is always on its boundary. The reason is that what the learner ultimately cares about is her total loss  $\sum_{t=1}^T \langle p_t, \ell_t \rangle = \sum_{t=1}^T \langle \phi(p_t), \ell_t \rangle + \text{Reg}(\phi)$ , and when a comparator-adaptive bound on  $\text{Reg}(\phi)$  is available, we should consider the  $\phi$  that minimizes the sum  $\sum_{t=1}^T \langle \phi(p_t), \ell_t \rangle + \text{Reg}(\phi)$ , instead of just  $\sum_{t=1}^T \langle \phi(p_t), \ell_t \rangle$ , and in this case, it is totally possible that the best  $\phi$  is not in  $\Phi_b$ .

### 3 Achieving $c_\phi$ -Dependent Regret via a Special Prior

In this section, we present a new and general idea to achieve a  $c_\phi$ -dependent bound for  $\text{Reg}(\phi)$ . To this end, we define a prior distribution  $\pi$  over  $\Phi_b$  through the following definitions, which plays an important role in our approach.

**Definition 3.1** ( $\psi$ -induced distribution). *Given a row-stochastic matrix  $\psi \in \mathcal{S}$ , it induces a distribution  $\pi_\psi \in \Delta(\Phi_b)$  such that  $\pi_\psi(\phi) = \prod_{i \in [d]} \langle \psi_{i:}, \phi_{i:} \rangle$  for all  $\phi \in \Phi_b$ .<sup>2</sup>*

**Definition 3.2** (special prior distribution  $\pi$ ). *The prior distribution  $\pi$  over  $\Phi_b$  is a mixture of  $d+1$  distributions such that*

$$\pi \triangleq \frac{1}{2d} \sum_{k=1}^d \pi_{\psi^k} + \frac{1}{2} \pi_{\psi^{d+1}}, \quad (1)$$

where  $\psi^1, \dots, \psi^{d+1} \in \mathcal{S}$  are defined as

$$\psi^k \triangleq \frac{d-2}{d-1} \cdot \mathbf{1} e_k^\top + \frac{1}{d(d-1)} \mathbf{1} \mathbf{1}^\top, \forall k \in [d], \text{ and } \psi^{d+1} \triangleq \frac{d-2}{d-1} \cdot \mathbf{I} + \frac{1}{d(d-1)} \mathbf{1} \mathbf{1}^\top. \quad (2)$$

It is straightforward to verify that  $\psi^1, \dots, \psi^{d+1}$  are indeed row-stochastic matrices. In fact, when viewed as transformation rules, each  $\psi^k$  (for  $k \in [d]$ ) transforms all experts to expert  $k$  with a large probability mass of  $1 - 1/d$  and to other experts uniformly with the remaining mass, and similarly,

<sup>2</sup>We remark that this is a valid distribution since  $\sum_{\phi \in \Phi_b} \pi_\psi(\phi) = \sum_{\phi \in \Phi_b} \prod_{i,j \in [d]: \phi_{ij}=1} \psi_{ij} = \prod_{i=1}^d \sum_{j=1}^d \psi_{ij} = \prod_{i=1}^d 1 = 1$ .

178  $\psi^{d+1}$  transforms each expert to itself with a large probability mass of  $1 - 1/d$  and to other experts  
 179 uniformly with the remaining mass. At a high-level,  $\psi^{d+1}$  is intuitively connected to  $d_\phi^{\text{self}}$  in the  
 180 definition of  $c_\phi$  and  $\{\psi^k\}_{k \in [d]}$  are connected to  $d_\phi^{\text{unif}}$ . Building on such connections, we prove the  
 181 following main result.

182 **Theorem 3.3.** *For any  $\phi \in \Phi_b$ , we have  $\log(\frac{1}{\pi(\phi)}) \leq 2 + 2c_\phi \log d$ . Consequently, if an algorithm  
 183 achieves*

$$\text{Reg}(\phi) = \mathcal{O} \left( \sqrt{T \log \left( \frac{1}{\pi(\phi)} \right)} + B \right) \quad (3)$$

184 *for all  $\phi \in \Phi_b$  and some  $\phi$ -independent term  $B$ , then it also achieves  $\text{Reg}(\phi) =$   
 185  $\mathcal{O} \left( \sqrt{(1 + c_\phi \log d)T} + B \right)$  for all  $\phi \in \mathcal{S}$  simultaneously.*

186 We defer the proof to [Appendix A](#) and give some intuition here by considering two special cases.  
 187 First, consider a  $\phi \in \Phi_{\text{Ext}}$ : we know that  $\phi = \mathbf{1}e_i^\top$  for some  $i \in [d]$  and thus  $\pi(\phi) \geq \frac{1}{2d}\pi_{\psi^i}(\phi) =$   
 188  $\frac{1}{2d}(1 - \frac{1}{d})^d = \Theta(1/d)$ , meaning that  $\log(1/\pi(\phi))$  is of order  $\log d$  and consistent with  $c_\phi \log d$ . As  
 189 another example, consider a  $\phi \in \Phi_{\text{Int}}$ : we have  $\phi = \mathbf{I} - e_i e_i^\top + e_i e_j^\top$  for some  $i \neq j$  and thus  
 190  $\pi(\phi) \geq \frac{1}{2}\pi_{\psi^{d+1}}(\phi) = \frac{1}{2}(1 - \frac{1}{d})^{d-1} \cdot \frac{1}{d(d-1)} = \Theta(1/d^2)$ , which means  $\log(1/\pi(\phi))$  is also of order  
 191  $\log d$  and consistent with  $c_\phi \log d$ .

192 To see why [Eq. \(3\)](#) is a natural bound one should aim for, we recall a standard idea from [Blum](#)  
 193 [and Mansour \[2007\]](#), [Gordon et al. \[2008\]](#) that reduces the  $\Phi$ -regret for the expert problem to  
 194 the standard (external) regret of an Online Linear Optimization (OLO) problem over  $\Phi$ : if at  
 195 each round  $t$ , the proposed distribution over experts  $p_t \in \Delta(d)$  is computed as the stationary  
 196 distribution of some  $\phi_t \in \mathcal{S}$  (that is,  $p_t = \phi_t(p_t)$ ), then we have  $\text{Reg}(\phi) = \sum_{t=1}^T \langle p_t - \phi(p_t), \ell_t \rangle =$   
 197  $\sum_{t=1}^T \langle \phi_t(p_t) - \phi(p_t), \ell_t \rangle = \sum_{t=1}^T \langle \phi_t - \phi, p_t \ell_t^\top \rangle$ , which means  $\text{Reg}(\phi)$  is exactly the standard  
 198 regret of the sequence  $\phi_1, \dots, \phi_T$  against a fixed  $\phi$  for an OLO instance with  $\langle \cdot, p_t \ell_t^\top \rangle$  as the  
 199 linear loss function in round  $t$ . We can solve this OLO instance by treating it as yet another expert  
 200 problem with  $\Phi_b$  as the expert set, in which case a bound in the form of [Eq. \(3\)](#) is just the standard  
 201 prior-dependent regret achievable by many algorithms, such as MWU.

202 The caveat, of course, is that naively doing so is computationally inefficient since the size of  $\Phi_b$  is  
 203  $d^d$ . In fact, a similar concern was raised by [Lu et al. \[2025\]](#) as a motivation for their totally different  
 204 approach. However, thanks to the special structure of our prior  $\pi$ , we manage to develop two different  
 205 efficient approaches to achieve [Eq. \(3\)](#), as shown in the next two sections.

206 **Regret comparison with [Lu et al. \[2025\]](#)** In our two approaches that achieve [Eq. \(3\)](#), the term  $B$  is  
 207 either  $\mathcal{O}(\sqrt{T \log \log d})$  or  $\mathcal{O}(\sqrt{T \log d})$ , making our final regret bound essentially  $\mathcal{O}(\sqrt{c_\phi T \log d})$ .

208 Compared to the bound  $\mathcal{O}(\sqrt{c_\phi(T + d)(\log d)^3})$  of [Lu et al. \[2025\]](#), we have thus removed the  
 209 extra  $\tilde{\mathcal{O}}(\sqrt{c_\phi d})$  additive term and also the extra  $\log d$  factor. When specified to standard regret  
 210 notations (external/internal/swap regret), our bound exactly recovers the minimax bound while theirs  
 211 exhibits a slight gap.

## 212 4 First Approach: Learning over Multiple Kernelized MWU's

213 In this section, we introduce our first approach to achieve [Eq. \(3\)](#). As mentioned, based on standard  
 214 analysis (see e.g., [\[Freund and Schapire, 1999\]](#)), simply running MWU ([Algorithm 1](#)) with expert set  
 215  $\Phi_b$ , a fixed learning rate  $\eta > 0$ , and our prior distribution  $\pi$  defined in [Eq. \(1\)](#) to get  $q_t \in \Delta(\Phi_b)$  and  
 216 outputting the stationary distribution of  $\mathbb{E}_{\phi \sim q_t}[\phi]$  already gives  $\text{Reg}(\phi) \leq \frac{\text{KL}(q, \pi)}{\eta} + \eta T$  for any  $\phi \in \mathcal{S}$   
 217 and  $q \in Q_\phi$  (recall  $Q_\phi$  defined in [Definition 2.1](#)), which further implies  $\text{Reg}(\phi) \leq \frac{\log(1/\pi(\phi))}{\eta} + \eta T$   
 218 for any  $\phi \in \Phi_b$ . With the “optimal tuning” of  $\eta$ , [Eq. \(3\)](#) would have been achieved. However, there  
 219 is no such fixed “optimal tuning” since we require the bound to hold for all  $\phi$  simultaneously, and  
 220 different  $\phi$  might lead to different optimal tuning. We will first address this issue using a simple idea,  
 221 before addressing the other obvious issue that naively running MWU is computationally inefficient.



---

**Algorithm 1** MWU over  $\Phi_b$  with prior  $\pi$ 

---

**Input:** learning rate  $\eta > 0$  and prior distribution  $\pi$  defined in [Definition 3.2](#). Initialize  $q_1$  as  $\pi$ .

**for**  $t = 1, 2, \dots, T$  **do**

    Propose  $\phi_t = \mathbb{E}_{\phi \sim q_t}[\phi] \in \mathcal{S}$  and receive loss matrix  $p_t \ell_t^\top \in [0, 1]^{d \times d}$ .  
    Update  $q_{t+1}$  such that  $q_{t+1}(\phi) \propto q_t(\phi) \exp(-\eta \langle \phi, p_t \ell_t^\top \rangle)$ .

---

---

**Algorithm 2** Meta MWU Algorithm

---

**Initialization:** Set  $\eta = \sqrt{\frac{\log \log d}{T}}$ ,  $M = 2 \lceil \log_2 d \rceil$ , and  $w_1 = \frac{1}{M} \cdot \mathbf{1} \in \Delta(M)$ ; initialize  $M$  instances of [Algorithm 1](#) (or [Algorithm 3](#))  $\{\mathcal{B}_h\}_{h=1}^M$  with the learning rate for  $\mathcal{B}_h$  being  $\eta_h = \sqrt{2^h/T}$ .

**for**  $t = 1, 2, \dots, T$  **do**

    Receive  $\phi_t^h = \mathbb{E}_{\phi \sim q_t^h}[\phi]$  from  $\mathcal{B}_h$  for each  $h \in [M]$  and compute  $\phi_t = \sum_{h=1}^M w_{t,h} \phi_t^h$ .  
    Play the stationary distribution  $p_t$  of  $\phi_t$  (that is,  $p_t = \phi_t(p_t)$ ) and receive loss  $\ell_t$ .  
    Update  $w_{t+1}$  such that  $w_{t+1,h} \propto w_{t,h} \exp(-\eta \ell_{t,h}^w)$ , where  $\ell_{t,h}^w = \langle \phi_t^h, p_t \ell_t^\top \rangle$  for each  $h \in [M]$ .  
    Send loss matrix  $p_t \ell_t^\top$  to  $\mathcal{B}_h$  for each  $h \in [M]$ .

---

**Learning the learning rate via a meta MWU** While there are many different ways to handle the aforementioned issue of parameter tuning (see e.g., [Luo and Schapire \[2015\]](#), [Koolen and Van Erven \[2015\]](#)), we resort to the most basic idea of learning the learning rate via another meta MWU, which is important for resolving the computational inefficiency later; see [Algorithm 2](#) for the pseudocode. Specifically, the meta MWU learns over and combines decisions from a set of  $2 \lceil \log_2 d \rceil$  base learners, the  $h$ -th of which is an instance of MWU ([Algorithm 1](#)) with learning rate  $\eta_h = \sqrt{2^h/T}$ . This ensures that the optimal learning rate of interest always lies in  $[\eta_h, 2\eta_h]$  for certain  $h$ . At each round  $t$ , the meta MWU maintains a distribution  $w_t$  over all base learners. After receiving  $\phi_t^h$ , the expected transformation matrix from each base learner  $\mathcal{B}_h$ , the meta MWU computes the weighted average of them using  $w_t$  and proposes  $p_t$  as the stationary distribution of this weighted average.<sup>3</sup> Then, after receiving the loss vector  $\ell_t$ , the meta MWU constructs the loss  $\ell_{t,h}^w \triangleq \langle \phi_t^h, p_t \ell_t^\top \rangle$  for each  $\mathcal{B}_h$  and updates its weight  $w_t$  via an exponential weight update. Finally, the meta MWU sends the loss matrix  $p_t \ell_t^\top$  to each base learner  $\mathcal{B}_h$ . It is straightforward to prove the following result.

**Theorem 4.1.** *Algorithm 2 guarantees  $\text{Reg}(\phi) = \mathcal{O}\left(\sqrt{TKL(q, \pi)} + \sqrt{T \log \log d}\right)$  for any  $\phi \in \mathcal{S}$  and  $q \in Q_\phi$ . Consequently, it also guarantees [Eq. \(3\)](#) with  $B = \sqrt{T \log \log d}$  and thus  $\text{Reg}(\phi) = \mathcal{O}\left(\sqrt{(1 + c_\phi \log d)T} + \sqrt{T \log \log d}\right)$  for any  $\phi \in \mathcal{S}$ .*

The bound in terms of  $\sqrt{TKL(q, \pi)}$  is stronger than what we need in [Eq. \(3\)](#), and using this stronger version in fact also allows us to additionally obtain the near-optimal  $\varepsilon$ -quantile regret bound of order  $\mathcal{O}(\sqrt{T \log(1/\varepsilon)} + \sqrt{T \log \log d})$  when competing with the top  $\varepsilon$ -quantile of experts [[Chaudhuri et al., 2009](#)]; see [Theorem B.3](#) for details.

**Efficient Implementation of Algorithm 1 via Kernelization** To address the computational inefficiency of [Algorithm 1](#), we take inspiration from [Farina et al. \[2022b\]](#) that shows that [Algorithm 1](#) with a uniform prior can be simulated efficiently as long as a certain kernel function can be evaluated efficiently, and extend their idea from uniform prior to non-uniform prior. Specifically, we propose the following prior-dependent kernel function.

**Definition 4.2** (kernel function). *Define kernel  $K(B, A) = \sum_{\phi \in \Phi_b} \pi(\phi) \prod_{i,j \in [d]: \phi_{ij}=1} B_{ij} A_{ij}$  for any  $B, A \in \mathbb{R}^{d \times d}$ .*

We then show that this kernel function can be evaluated efficiently thanks to the structure of our prior  $\pi$  and consequently the key output  $\phi_t$  in [Algorithm 1](#) (required for [Algorithm 2](#)) can also be computed efficiently via the Kernelized MWU shown in [Algorithm 3](#).

---

<sup>3</sup>We remark that it is important to use the stationary distribution of the weighted average of  $\phi_t^h$ , but not the weighted average of the stationary distribution of  $\phi_t^h$ .

---

**Algorithm 3** Kernelized MWU with non-uniform prior

---

**Input:** learning rate  $\eta > 0$  and prior distribution  $\pi$  (Definition 3.2); initialize  $B_1 = \mathbf{1}\mathbf{1}^\top \in \mathbb{R}^{d \times d}$ .  
**for**  $t = 1, 2, \dots, T$  **do**

Compute  $\phi_t \in \mathcal{S}$  such that  $(\phi_t)_{ij} = 1 - \frac{K(B_t, \mathbf{1}\mathbf{1}^\top - e_i e_j^\top)}{K(B_t, \mathbf{1}\mathbf{1}^\top)}$ .  
Receive  $p_t \ell_t^\top$  and update  $B_{t+1} \in \mathbb{R}^{d \times d}$  such that  $(B_{t+1})_{ij} = (B_t)_{ij} \cdot \exp(-\eta(p_t \ell_t^\top)_{ij})$ .

---

**Theorem 4.3.** *The kernel function  $K$  defined in Definition 4.2 can be evaluated in time  $\mathcal{O}(d^3)$ . Moreover, the  $\phi_t$  matrix computed by Algorithm 1 and Algorithm 3 are exactly the same.*

This theorem already shows that each iteration of Algorithm 3 can be implemented in time  $\mathcal{O}(d^5)$  since it requires evaluating the kernel  $2d^2$  times. However, by reusing some intermediate statistics that are common in these  $2d^2$  kernel evaluations, we can further speed up the algorithm such that each iteration takes only  $\mathcal{O}(d^3)$  time; see Appendix B.3.2 for details.

Combining Theorem 4.3 and Theorem 4.1, we have thus shown that Algorithm 2 is an efficient algorithm with regret  $\text{Reg}(\phi) = \mathcal{O}(\sqrt{(1 + c_\phi \log d)T} + \sqrt{T \log \log d})$  for all  $\phi \in \mathcal{S}$  simultaneously.

## 5 Second Approach: Learning over Multiple BM-Reductions

In this section, we introduce our second approach to achieve Eq. (3) using a prior-aware variant of the BM-reduction [Blum and Mansour, 2007]. As a reminder, BM-reduction reduces swap regret minimization to  $d$  external regret minimization problems, each with a different scaled loss vector in each round, and achieves  $\text{Reg}(\phi) \leq \frac{d \log d}{\eta} + \eta T$  when each base external regret minimization algorithm is MWU (over  $[d]$ ) with learning rate  $\eta$ . Given a prior  $\pi \in \Delta(\Phi_b)$ , it is natural to ask whether a variant of BM-reduction can achieve  $\text{Reg}(\phi) \leq \frac{\log(1/\pi(\phi))}{\eta} + \eta T$ , replacing  $d \log d$  with  $\log(1/\pi(\phi))$ . We first show that this is indeed possible, but only when  $\pi$  is a  $\psi$ -induced distribution for some  $\psi \in \mathcal{S}$  (Definition 3.1), and the only modification needed is to let the  $i$ -th MWU subroutine use the prior  $\psi_i \in \Delta(d)$ . See Theorem C.1 in Appendix C for details.

Given that our prior of interest is a mixture of  $d + 1$  distributions induced by  $\psi^1, \dots, \psi^{d+1}$  (Definition 3.2) and also the same issue that a fixed learning rate  $\eta$  cannot be adaptive to different comparator  $\phi$ , we propose a natural meta-base framework that is very similar to Algorithm 2 and learns over both different  $\psi^k$  and different learning rates. Specifically, we maintain  $(d + 1)M$  (where  $M$  is again  $2 \lceil \log_2 d \rceil$ ) base-learners  $\mathcal{B}_{k,h}$ , indexed by  $k \in [d + 1]$  and  $h \in [M]$ . Each base-learner  $\mathcal{B}_{k,h}$  is an instance of the prior-aware BM-reduction Algorithm 8 with prior  $\psi^k$  and learning rate  $\sqrt{2^h/T}$ . With this set of base learners, the rest of the algorithm is exactly the same as Algorithm 2, and we thus defer all details to Algorithm 7 in the appendix. The only crucial point (similar to Footnote 3) is that, even though the standard BM reduction directly outputs the stationary distribution of a stochastic matrix, it is important here that we first take a convex combination of these stochastic matrices and then compute its stationary distribution, instead of using the convex combination of stationary distributions.

The following theorem shows that Algorithm 7 satisfies Eq. (3) with  $B = \sqrt{T \log d}$ .

**Theorem 5.1.** *Algorithm 7 satisfies Eq. (3) with  $B = \sqrt{T \log d}$ . Consequently, it guarantees  $\text{Reg}(\phi) = \mathcal{O}(\sqrt{(1 + c_\phi \log d)T} + \sqrt{T \log d})$  for any  $\phi \in \mathcal{S}$ .*

Even though the guarantee of this second approach is slightly worse than that of Algorithm 2 (but still better than Lu et al. [2025]), in the next section, we show that its particular structure is crucial in extending our results to games.

## 6 Applications to Games

In this section, we discuss how to extend Algorithm 7 to achieve accelerated and adaptive  $\Phi$ -equilibrium convergence in  $N$ -player general-sum normal-form games. We first introduce necessary background on the connection between online learning and games. Consider an  $N$ -player general-sum

normal-form game, where each player  $n \in [N]$  has a finite set of actions  $[d]$ .<sup>4</sup> For a given joint action profile  $\mathbf{a} = (a_1, \dots, a_N) \in [d]^N \triangleq \mathcal{A}$ , the loss received by player  $n$  is given by some loss function  $\ell^{(n)} : \mathcal{A} \rightarrow [0, 1]$ . For notational convenience, denote  $\mathbf{a}^{(-n)} = (a_1, \dots, a_{n-1}, a_{n+1}, \dots, a_N)$ . Given  $\Phi = \times_{n=1}^N \Phi_n$  where each  $\Phi_n \subseteq \mathcal{S}$  is a set of action transformations for player  $n$ , the corresponding (approximate)  $\Phi$ -equilibrium is defined as follows.

**Definition 6.1** ( $\varepsilon$ -approximate  $\Phi$ -equilibrium). *We call a distribution  $\mathbf{p} \in \Delta(\mathcal{A})$  over all joint action profiles an  $\varepsilon$ -approximate  $\Phi$ -equilibrium if for all players  $n \in [N]$  and all  $\phi \in \Phi_n$ ,  $\mathbb{E}_{\mathbf{a} \sim \mathbf{p}}[\ell^{(n)}(\mathbf{a})] \leq \mathbb{E}_{\mathbf{a} \sim \mathbf{p}}[\ell^{(n)}(\phi(a^{(n)}), \mathbf{a}^{(-n)})] + \varepsilon$ . When  $\varepsilon = 0$ , we call  $\mathbf{p}$  a  $\Phi$ -equilibrium.*

When  $\Phi_n = \Phi_{\text{Ext}}$  for all  $n$ ,  $\Phi$ -equilibrium reduces to *Coarse Correlated Equilibrium* (CCE), and when  $\Phi_n = \Phi_b$  for all  $n$ ,  $\Phi$ -equilibrium reduces to *Correlated Equilibrium* (CE).

Approximate  $\Phi$ -equilibrium can be found via the following uncoupled no-regret learning dynamic. At each round  $t \in [T]$ , each player  $n$  proposes  $p_t^{(n)} \in \Delta(d)$ , forming an uncorrelated distribution  $\mathbf{p}_t = (p_t^{(1)}, \dots, p_t^{(N)})$ , and receives a loss vector  $\ell_t^{(n)} \in [0, 1]^d$  as the feedback where  $\ell_{t,a}^{(n)} \triangleq \mathbb{E}_{\mathbf{a} \sim \mathbf{p}_t}[\ell^{(n)}(a, \mathbf{a}^{(-n)})]$ , for any  $a \in [d]$ . The  $\Phi_n$ -regret for player  $n$  is then defined as  $\text{Reg}_n \triangleq \max_{\phi \in \Phi_n} \text{Reg}_n(\phi) = \max_{\phi \in \Phi_n} \sum_{t=1}^T \langle p_t^{(n)} - \phi(p_t^{(n)}), \ell_t^{(n)} \rangle$ , and we denote the special case of external regret for  $\Phi_n = \Phi_{\text{Ext}}$  as  $\text{Reg}_n^{\text{Ext}}$ . The following proposition from [Greenwald and Jafari \[2003\]](#) builds the connection between no- $\Phi$ -regret learning and convergence to  $\Phi$ -equilibrium.

**Proposition 6.2** ([\[Greenwald and Jafari, 2003\]](#)). *The empirical distribution of joint strategy profiles, that is, uniform over  $\mathbf{p}_1, \dots, \mathbf{p}_T$ , is a  $\frac{\max_{n \in [N]} \{\text{Reg}_n\}}{T}$ -approximate  $\Phi$ -equilibrium.*

While one can apply our [Algorithm 2](#) or [Algorithm 7](#) directly for each player to obtain  $1/\sqrt{T}$  convergence rate that is adaptive to the complexity of  $\Phi$ , we are interested in achieving accelerated  $\tilde{\mathcal{O}}(1/T)$  convergence rate that has been shown possible in recent years for canonical  $\Phi$ . For example, for CCE, [Daskalakis et al. \[2021\]](#), [Farina et al. \[2022a\]](#), [Soleymani et al. \[2025\]](#) show the following  $\text{polylog}(T)$  bound on  $\text{Reg}_n^{\text{Ext}}$  respectively:  $\mathcal{O}(N \log d \log^4 T)$ ,  $\mathcal{O}(Nd \log T)$ ,  $\mathcal{O}(N \log^2 d \log T)$ ; for CE, [Anagnostides et al. \[2022a,b\]](#) show the following bound on  $\text{Reg}_n$ :  $\mathcal{O}(Nd \log d \log^4 T)$  and  $\mathcal{O}(Nd^{2.5} \log T)$ . Our goal is to achieve similar fast rates while at the same time being adaptive to the complexity of  $\Phi$ , and we successfully achieve so, albeit only for the following class of games.

**Definition 6.3** (Nonnegative-social-external-regret games). *We call a game a nonnegative-social-external-regret game if  $\sum_{n=1}^N \text{Reg}_n^{\text{Ext}} \geq 0$  always holds.*

This class was explicitly considered in [Anagnostides et al. \[2022c\]](#) and contains a broad family of well-studied games, including constant-sum polymatrix games, polymatrix strategically zero-sum games, and quasiconvex-quasiconcave games. Therefore, we believe that our results are still very general and non-trivial. We are unable to deal with general games using ideas from aforementioned recent work due to the two-layer nature of our algorithms. In fact, even when considering only this subclass of games, it is unclear to us how to make our first approach discussed in [Section 4](#) or the algorithm of [Lu et al. \[2025\]](#) work, and we have to resort to extending our [Algorithm 7](#). In the following, we discuss how we design our algorithm (shown in [Algorithm 4](#)) based on similar ideas of [Algorithm 7](#) and what extra ingredients are needed.

**Base learners** Compared to [Algorithm 7](#), there are several differences in the base learner design. First, while we still maintain a base learner  $\mathcal{B}_k$  ([Algorithm 8](#)) for each prior  $\psi^k$ , we do not need to maintain different copies of it to account for different learning rates, since in the end we will use a fixed constant learning rate, similar to prior work on accelerated convergence. Second, inspired by a long line of work showing that optimism accelerates convergence, for each  $\mathcal{B}^k$ , we replace its subroutines from MWU to Optimistic MWU (OMWU) [[Rakhlin and Sridharan, 2013](#), [Syrgkanis et al., 2015](#)] ([Algorithm 9](#)). Finally, besides these  $d + 1$  base learners, we additionally include a base learner  $\mathcal{B}_{d+2}$ , an instance of OMWU ([Algorithm 9](#)) with a uniform prior, to explicitly minimize external regret. This last modification is in a way most crucial to our analysis, since it allows us to utilize the nonnegative-social-external-regret property and show that the path-length of the entire learning dynamic is  $T$ -independent and of order  $\mathcal{O}(N \log d)$  only; see [Appendix D.3](#) for details.

<sup>4</sup>For notational conciseness, we assume that the action set size is the same for all players, but our analysis can be directly extended to games with different action set sizes.



---

**Algorithm 4** Meta Algorithm for Accelerated and Adaptive Convergence in Games

---

**Input:** learning rate  $\eta_m > 0$ , correction scale  $\lambda > 0$

- 1 **Initialize:**  $d + 2$  base learners  $\mathcal{B}_1, \dots, \mathcal{B}_{d+2}$ , all with learning rate  $\eta = \frac{1}{16N}$ . For  $k < d + 2$ ,  $\mathcal{B}_k$  is an instance of [Algorithm 8](#) with prior  $\psi^k$  and SubAlg being OMWU ([Algorithm 9](#));  $\mathcal{B}_{d+2}$  is an instance of [Algorithm 9](#) (with uniform prior); set  $\hat{w}_1 = [\frac{1}{2d}, \dots, \frac{1}{2d}, \frac{1}{4}, \frac{1}{4}] \in \Delta(d + 2)$ .
  - for**  $t = 1, 2, \dots, T$  **do**
  - 2   Receive  $\phi_t^k \in \mathcal{S}$  from base learner  $\mathcal{B}_k$  for each  $k \in [d + 2]$ .
  - 3   Compute  $c_t \in \mathbb{R}^{d+2}$  where  $c_{t,k} = \lambda \|\tilde{p}_{t-1}^k - \tilde{p}_{t-2}^k\|_1^2 \cdot \mathbb{1}\{t \geq 3\}$  and  $\tilde{p}_t^k = \phi_t^k(p_t)$ .
  - 4   Compute  $m_t^w \in \mathbb{R}^{d+2}$  where  $m_{t,k}^w = \langle \phi_t^k, p_{t-1} \ell_{t-1}^\top \rangle \cdot \mathbb{1}\{t \geq 2\}$  for  $k \in [d + 2]$ .
  - 5   Compute  $w_t$  such that  $w_{t,k} \propto \hat{w}_{t,k} \exp(-\eta_m(m_{t,k}^w + c_{t,k}))$ .
  - 6   Compute  $\phi_t = \sum_{k=1}^{d+2} w_{t,k} \phi_t^k$  and play stationary distribution  $p_t$  satisfying  $p_t = \phi_t(p_t)$ .
  - 7   Receive  $\ell_t$  and compute  $\ell_t^w \in \mathbb{R}^{d+2}$  where  $\ell_{t,k}^w = \langle \phi_t^k, p_t \ell_t^\top \rangle$  for  $k \in [d + 2]$ .
  - 8   Update  $\hat{w}_{t+1}$  such that  $\hat{w}_{t+1,k} \propto \hat{w}_{t,k} \exp(-\eta_m(\ell_{t,k}^w + c_{t,k}))$ .
  - 9   Send  $p_t \ell_t^\top$  to  $\mathcal{B}_k$  for  $k \in [d + 1]$  and send  $\ell_t$  to  $\mathcal{B}_{d+2}$ .
- 

341 **Meta learner** In addition, there are also several modifications to the meta learner compared to  
 342 [Algorithm 7](#). First, similar to the base learners, instead of using MWU, we apply OMWU to compute  
 343  $w_t$  and the auxiliary  $\hat{w}_t$  ([Line 5](#) and [Line 8](#) of [Algorithm 4](#)). Importantly, the update of  $w_t$  uses  
 344 a “predictive loss vector”  $m_t^w$  such that  $m_{t,k}^w = \langle \phi_t^k, p_{t-1} \ell_{t-1}^\top \rangle$  ([Line 4](#)). The fact that  $m_t^w$  is not  
 345 simply the previous loss vector  $\ell_{t-1}^w$ , a canonical setup for OMWU, is important for the analysis,  
 346 as already shown in [Zhang et al. \[2022\]](#) under a different context. Second, also inspired by [Zhang](#)  
 347 [et al. \[2022\]](#), in order to aggregate the guarantee for all base learners, in both the update of  $w_t$  and  
 348  $\hat{w}_t$ , we propose to add a stability correction term  $c_t$  ([Line 3](#) of [Algorithm 4](#)), which guides the meta  
 349 algorithm to bias toward the more stable base learners, hence also stabilizing the final decision. While  
 350 the idea is similar, the specific value of  $c_{t,k}$  is tailored to our analysis and takes into account not only  
 351 the stability of  $\phi_t^k$  from the base learner  $\mathcal{B}_k$  but also the stability of the stationary distribution  $p_t$ . Our  
 352 main result is as follows.

353 **Theorem 6.4.** *For an  $N$ -player normal-form general-sum game satisfying [Definition 6.3](#), if each*  
 354 *player  $n \in [N]$  runs [Algorithm 4](#) with  $\eta_m = \frac{1}{64N}$  and  $\lambda = N$ , then we have  $\text{Reg}_n(\phi) =$*   
 355  *$\mathcal{O}(c_\phi N \log d + N^2 \log d)$  and  $\text{Reg}_n^{\text{Ext}} = \mathcal{O}(N \log d)$  for all  $n \in [N]$ . Consequently, the uni-*  
 356 *form distribution over their joint strategy profiles is an  $\mathcal{O}\left(\frac{N \log d}{T}\right)$ -approximate CCE and also an*  
 357  *$\mathcal{O}\left(\frac{\max_{n \in [N], \phi \in \Phi_n} c_\phi N \log d + N^2 \log d}{T}\right)$ -approximate  $\Phi$ -equilibrium, simultaneously for all  $\Phi \subseteq \mathcal{S}^N$ .*

358 To our knowledge, our result achieves the first adaptive and accelerated  $\Phi$ -equilibrium guarantee. For  
 359 the special case of CCE, the rate  $\mathcal{O}\left(\frac{N \log d}{T}\right)$  matches that of OMWU (for nonnegative-social-external-  
 360 regret games), and for CE, it is unclear at all what better results one can obtain for nonnegative-social-  
 361 external-regret games than those rates from [\[Anagnostides et al., 2022a,b\]](#) for general games. If we  
 362 compare their bounds to ours, since  $\max_{n \in [N], \phi \in \Phi_n} c_\phi = d$  in this case, we improve over [Anag-](#)  
 363 [nostides et al. \[2022b\]](#) on the  $d$ -dependence and remove any  $\text{polylog}(T)$  dependence compared  
 364 to [Anagnostides et al. \[2022a,b\]](#). One disadvantage of our results is the additive term of  $N^2 \log d$  for  
 365  $\Phi$ -equilibrium other than CCE. Removing this term is an interesting future direction.

## 366 7 Conclusion and Future Directions

367 In this work, we significantly improve over a recent work by [Lu et al. \[2025\]](#) regarding comparator  
 368 adaptive  $\Phi$ -regret, by developing simpler algorithms, better bounds, and broader applications to games.  
 369 The most interesting future direction is to improve our results for games, especially to remove the  
 370 requirement on nonnegative social external regret. The idea of high-order stability from [Daskalakis](#)  
 371 [et al. \[2021\]](#), [Anagnostides et al. \[2022a\]](#) might be useful, but appropriately combining this idea with  
 372 our approaches requires further investigation. For the expert problem, it is also interesting to derive  
 373 comparator-adaptive  $\Phi$ -regret with respect to other complexity measure of the comparator.

## References

- Ioannis Anagnostides, Constantinos Daskalakis, Gabriele Farina, Maxwell Fishelson, Noah Golowich, and Tuomas Sandholm. Near-optimal no-regret learning for correlated equilibria in multi-player general-sum games. In *Proceedings of the 54th Annual ACM SIGACT Symposium on Theory of Computing*, pages 736–749, 2022a.
- Ioannis Anagnostides, Gabriele Farina, Christian Kroer, Chung-Wei Lee, Haipeng Luo, and Tuomas Sandholm. Uncoupled learning dynamics with  $o(\log t)$  swap regret in multiplayer games. *Advances in Neural Information Processing Systems*, 35:3292–3304, 2022b.
- Ioannis Anagnostides, Ioannis Panageas, Gabriele Farina, and Tuomas Sandholm. On last-iterate convergence beyond zero-sum games. In *International Conference on Machine Learning*, pages 536–581. PMLR, 2022c.
- Martino Bernasconi, Matteo Castiglioni, Alberto Marchesi, Francesco Trovo, and Nicola Gatti. Constrained phi-equilibria. In *International Conference on Machine Learning*, pages 2184–2205. PMLR, 2023.
- Aditya Bhaskara, Ashok Cutkosky, Ravi Kumar, and Manish Purohit. Online linear optimization with many hints. *Advances in neural information processing systems*, 33:9530–9539, 2020.
- David Blackwell. An analog of the minimax theorem for vector payoffs. *Pacific Journal of Mathematics*, 6(1):1–8, 1956.
- Avrim Blum and Yishay Mansour. From external to internal regret. *Journal of Machine Learning Research*, 8(6), 2007.
- Yang Cai, Constantinos Daskalakis, Haipeng Luo, Chen-Yu Wei, and Weiqiang Zheng. On tractable  $\Phi$ -equilibria in non-concave games. *Advances in Neural Information Processing Systems*, 2024.
- Nicolo Cesa-Bianchi and Gábor Lugosi. *Prediction, learning, and games*. Cambridge university press, 2006.
- Kamalika Chaudhuri, Yoav Freund, and Daniel J Hsu. A parameter-free hedging algorithm. *Advances in neural information processing systems*, 22, 2009.
- Liyu Chen, Haipeng Luo, and Chen-Yu Wei. Impossible tuning made possible: A new expert algorithm and its applications. In *Conference on Learning Theory*, pages 1216–1259. PMLR, 2021.
- Ashok Cutkosky. *Algorithms and Lower Bounds for Parameter-free Online Learning*. Stanford University, 2018.
- Ashok Cutkosky. Combining online learning guarantees. In *Conference on Learning Theory*, pages 895–913. PMLR, 2019.
- Yuval Dagan, Constantinos Daskalakis, Maxwell Fishelson, and Noah Golowich. From external to swap regret 2.0: An efficient reduction for large action spaces. In *Proceedings of the 56th Annual ACM Symposium on Theory of Computing*, pages 1216–1222, 2024.
- Constantinos Daskalakis, Alan Deckelbaum, and Anthony Kim. Near-optimal no-regret algorithms for zero-sum games. In *Proceedings of the twenty-second annual ACM-SIAM symposium on Discrete Algorithms*, pages 235–254. SIAM, 2011.
- Constantinos Daskalakis, Maxwell Fishelson, and Noah Golowich. Near-optimal no-regret learning in general games. *Advances in Neural Information Processing Systems*, 34:27604–27616, 2021.
- Gabriele Farina, Ioannis Anagnostides, Haipeng Luo, Chung-Wei Lee, Christian Kroer, and Tuomas Sandholm. Near-optimal no-regret learning dynamics for general convex games. *Advances in Neural Information Processing Systems*, 35:39076–39089, 2022a.
- Gabriele Farina, Chung-Wei Lee, Haipeng Luo, and Christian Kroer. Kernelized multiplicative weights for 0/1-polyhedral games: Bridging the gap between learning in extensive-form and normal-form games. In *International Conference on Machine Learning*, pages 6337–6357. PMLR, 2022b.

422 Dean P Foster and Rakesh Vohra. Regret in the on-line decision problem. *Games and Economic*  
423 *Behavior*, 29(1-2):7–35, 1999.

424 Dylan J Foster, Satyen Kale, Mehryar Mohri, and Karthik Sridharan. Parameter-free online learning  
425 via model selection. *Advances in Neural Information Processing Systems*, 30, 2017.

426 Yoav Freund and Robert E Schapire. A decision-theoretic generalization of on-line learning and an  
427 application to boosting. *Journal of computer and system sciences*, 55(1):119–139, 1997.

428 Yoav Freund and Robert E Schapire. Adaptive game playing using multiplicative weights. *Games*  
429 *and Economic Behavior*, 29(1-2):79–103, 1999.

430 Geoffrey J Gordon, Amy Greenwald, and Casey Marks. No-regret learning in convex games. In  
431 *Proceedings of the 25th international conference on Machine learning*, pages 360–367, 2008.

432 Amy Greenwald and Amir Jafari. A general class of no-regret learning algorithms and game-theoretic  
433 equilibria. In *Learning Theory and Kernel Machines: 16th Annual Conference on Learning*  
434 *Theory and 7th Kernel Workshop, COLT/Kernel 2003, Washington, DC, USA, August 24-27, 2003.*  
435 *Proceedings*, pages 2–12. Springer, 2003.

436 James Hannan. Approximation to bayes risk in repeated play. *Contributions to the Theory of Games*,  
437 3(2):97–139, 1957.

438 Shinji Ito. A tight lower bound and efficient reduction for swap regret. *Advances in Neural Information*  
439 *Processing Systems*, 33:18550–18559, 2020.

440 Wouter M Koolen and Tim Van Erven. Second-order quantile methods for experts and combinatorial  
441 games. In *Conference on Learning Theory*, pages 1155–1175. PMLR, 2015.

442 Wouter M Koolen, Tim Van Erven, and Peter Grünwald. Learning the learning rate for prediction  
443 with expert advice. *Advances in neural information processing systems*, 27, 2014.

444 Nick Littlestone and Manfred K Warmuth. The weighted majority algorithm. *Information and*  
445 *computation*, 108(2):212–261, 1994.

446 Zhou Lu, Y Jennifer Sun, and Zhiyu Zhang. Sparsity-based interpolation of external, internal and  
447 swap regret. *arXiv preprint arXiv:2502.04543*, 2025.

448 Haipeng Luo and Robert E Schapire. Achieving all with no parameters: Adanormalhedge. In  
449 *Conference on Learning Theory*, pages 1286–1304. PMLR, 2015.

450 Jeffrey Negrea, Blair Bilodeau, Nicolò Campolongo, Francesco Orabona, and Dan Roy. Minimax  
451 optimal quantile and semi-adversarial regret via root-logarithmic regularizers. *Advances in Neural*  
452 *Information Processing Systems*, 34:26237–26249, 2021.

453 Francesco Orabona. A modern introduction to online learning. *arXiv preprint arXiv:1912.13213*,  
454 2019.

455 Binghui Peng and Aviad Rubinstein. Fast swap regret minimization and applications to approximate  
456 correlated equilibria. In *Proceedings of the 56th Annual ACM Symposium on Theory of Computing*,  
457 pages 1223–1234, 2024.

458 Georgios Piliouras, Mark Rowland, Shayegan Omidshafiei, Romuald Elie, Daniel Hennes, Jerome  
459 Connor, and Karl Tuyls. Evolutionary dynamics and phi-regret minimization in games. *Journal of*  
460 *Artificial Intelligence Research*, 74:1125–1158, 2022.

461 Alexander Rakhlin, Karthik Sridharan, and Ambuj Tewari. Online learning: Beyond regret. In  
462 *Proceedings of the 24th Annual Conference on Learning Theory*, pages 559–594. JMLR Workshop  
463 and Conference Proceedings, 2011.

464 Sasha Rakhlin and Karthik Sridharan. Optimization, learning, and games with predictable sequences.  
465 *Advances in Neural Information Processing Systems*, 26, 2013.

- 466 Ashkan Soleymani, Georgios Piliouras, and Gabriele Farina. Faster rates for no-regret learning in  
 467 general games via cautious optimism. In *Proceedings of the 57th Annual ACM Symposium on*  
 468 *Theory of Computing*, 2025.
- 469 Gilles Stoltz and Gábor Lugosi. Internal regret in on-line portfolio selection. *Machine Learning*, 59:  
 470 125–159, 2005.
- 471 Gilles Stoltz and Gábor Lugosi. Learning correlated equilibria in games with compact sets of  
 472 strategies. *Games and Economic Behavior*, 59(1):187–208, 2007.
- 473 Vasilis Syrgkanis, Alekh Agarwal, Haipeng Luo, and Robert E Schapire. Fast convergence of  
 474 regularized learning in games. *Advances in Neural Information Processing Systems*, 28, 2015.
- 475 Tim Van Erven and Wouter M Koolen. Metagrad: Multiple learning rates in online learning. *Advances*  
 476 *in Neural Information Processing Systems*, 29, 2016.
- 477 Brian Zhang, Ioannis Anagnostides, Gabriele Farina, and Tuomas Sandholm. Efficient  $\Phi$ -regret  
 478 minimization with low-degree swap deviations in extensive-form games. *Advances in Neural*  
 479 *Information Processing Systems*, 37:125192–125230, 2024.
- 480 Mengxiao Zhang, Peng Zhao, Haipeng Luo, and Zhi-Hua Zhou. No-regret learning in time-varying  
 481 zero-sum games. In *International Conference on Machine Learning*, pages 26772–26808. PMLR,  
 482 2022.

## NeurIPS Paper Checklist

### 1. Claims

Question: Do the main claims made in the abstract and introduction accurately reflect the paper's contributions and scope?

Answer: [\[Yes\]](#)

Justification: See abstract and the contribution paragraphs in [Section 1](#).

Guidelines:

- The answer NA means that the abstract and introduction do not include the claims made in the paper.
- The abstract and/or introduction should clearly state the claims made, including the contributions made in the paper and important assumptions and limitations. A No or NA answer to this question will not be perceived well by the reviewers.
- The claims made should match theoretical and experimental results, and reflect how much the results can be expected to generalize to other settings.
- It is fine to include aspirational goals as motivation as long as it is clear that these goals are not attained by the paper.

### 2. Limitations

Question: Does the paper discuss the limitations of the work performed by the authors?

Answer: [\[Yes\]](#)

Justification: See [Section 1](#) and [Section 6](#) for the discussion on the limitations.

Guidelines:

- The answer NA means that the paper has no limitation while the answer No means that the paper has limitations, but those are not discussed in the paper.
- The authors are encouraged to create a separate "Limitations" section in their paper.
- The paper should point out any strong assumptions and how robust the results are to violations of these assumptions (e.g., independence assumptions, noiseless settings, model well-specification, asymptotic approximations only holding locally). The authors should reflect on how these assumptions might be violated in practice and what the implications would be.
- The authors should reflect on the scope of the claims made, e.g., if the approach was only tested on a few datasets or with a few runs. In general, empirical results often depend on implicit assumptions, which should be articulated.
- The authors should reflect on the factors that influence the performance of the approach. For example, a facial recognition algorithm may perform poorly when image resolution is low or images are taken in low lighting. Or a speech-to-text system might not be used reliably to provide closed captions for online lectures because it fails to handle technical jargon.
- The authors should discuss the computational efficiency of the proposed algorithms and how they scale with dataset size.
- If applicable, the authors should discuss possible limitations of their approach to address problems of privacy and fairness.
- While the authors might fear that complete honesty about limitations might be used by reviewers as grounds for rejection, a worse outcome might be that reviewers discover limitations that aren't acknowledged in the paper. The authors should use their best judgment and recognize that individual actions in favor of transparency play an important role in developing norms that preserve the integrity of the community. Reviewers will be specifically instructed to not penalize honesty concerning limitations.

### 3. Theory assumptions and proofs

Question: For each theoretical result, does the paper provide the full set of assumptions and a complete (and correct) proof?

Answer: [\[Yes\]](#)



Justification: See [Section 1](#), [Section 2](#), and [Section 6](#) for the assumptions. See Appendix for complete proofs for all our theoretical results.

Guidelines:

- The answer NA means that the paper does not include theoretical results.
- All the theorems, formulas, and proofs in the paper should be numbered and cross-referenced.
- All assumptions should be clearly stated or referenced in the statement of any theorems.
- The proofs can either appear in the main paper or the supplemental material, but if they appear in the supplemental material, the authors are encouraged to provide a short proof sketch to provide intuition.
- Inversely, any informal proof provided in the core of the paper should be complemented by formal proofs provided in appendix or supplemental material.
- Theorems and Lemmas that the proof relies upon should be properly referenced.

#### 4. Experimental result reproducibility

Question: Does the paper fully disclose all the information needed to reproduce the main experimental results of the paper to the extent that it affects the main claims and/or conclusions of the paper (regardless of whether the code and data are provided or not)?

Answer: [NA]

Justification: This paper is theoretic-focused and does not include experiments.

Guidelines:

- The answer NA means that the paper does not include experiments.
- If the paper includes experiments, a No answer to this question will not be perceived well by the reviewers: Making the paper reproducible is important, regardless of whether the code and data are provided or not.
- If the contribution is a dataset and/or model, the authors should describe the steps taken to make their results reproducible or verifiable.
- Depending on the contribution, reproducibility can be accomplished in various ways. For example, if the contribution is a novel architecture, describing the architecture fully might suffice, or if the contribution is a specific model and empirical evaluation, it may be necessary to either make it possible for others to replicate the model with the same dataset, or provide access to the model. In general, releasing code and data is often one good way to accomplish this, but reproducibility can also be provided via detailed instructions for how to replicate the results, access to a hosted model (e.g., in the case of a large language model), releasing of a model checkpoint, or other means that are appropriate to the research performed.
- While NeurIPS does not require releasing code, the conference does require all submissions to provide some reasonable avenue for reproducibility, which may depend on the nature of the contribution. For example
  - (a) If the contribution is primarily a new algorithm, the paper should make it clear how to reproduce that algorithm.
  - (b) If the contribution is primarily a new model architecture, the paper should describe the architecture clearly and fully.
  - (c) If the contribution is a new model (e.g., a large language model), then there should either be a way to access this model for reproducing the results or a way to reproduce the model (e.g., with an open-source dataset or instructions for how to construct the dataset).
  - (d) We recognize that reproducibility may be tricky in some cases, in which case authors are welcome to describe the particular way they provide for reproducibility. In the case of closed-source models, it may be that access to the model is limited in some way (e.g., to registered users), but it should be possible for other researchers to have some path to reproducing or verifying the results.

#### 5. Open access to data and code

Question: Does the paper provide open access to the data and code, with sufficient instructions to faithfully reproduce the main experimental results, as described in supplemental material?

Answer: [NA]

Justification: This paper is theoretic-focused and does not include experiments.

Guidelines:

- The answer NA means that paper does not include experiments requiring code.
- Please see the NeurIPS code and data submission guidelines (<https://nips.cc/public/guides/CodeSubmissionPolicy>) for more details.
- While we encourage the release of code and data, we understand that this might not be possible, so “No” is an acceptable answer. Papers cannot be rejected simply for not including code, unless this is central to the contribution (e.g., for a new open-source benchmark).
- The instructions should contain the exact command and environment needed to run to reproduce the results. See the NeurIPS code and data submission guidelines (<https://nips.cc/public/guides/CodeSubmissionPolicy>) for more details.
- The authors should provide instructions on data access and preparation, including how to access the raw data, preprocessed data, intermediate data, and generated data, etc.
- The authors should provide scripts to reproduce all experimental results for the new proposed method and baselines. If only a subset of experiments are reproducible, they should state which ones are omitted from the script and why.
- At submission time, to preserve anonymity, the authors should release anonymized versions (if applicable).
- Providing as much information as possible in supplemental material (appended to the paper) is recommended, but including URLs to data and code is permitted.

## 6. Experimental setting/details

Question: Does the paper specify all the training and test details (e.g., data splits, hyper-parameters, how they were chosen, type of optimizer, etc.) necessary to understand the results?

Answer: [NA]

Justification: This paper is theoretic-focused and does not include experiments.

Guidelines:

- The answer NA means that the paper does not include experiments.
- The experimental setting should be presented in the core of the paper to a level of detail that is necessary to appreciate the results and make sense of them.
- The full details can be provided either with the code, in appendix, or as supplemental material.

## 7. Experiment statistical significance

Question: Does the paper report error bars suitably and correctly defined or other appropriate information about the statistical significance of the experiments?

Answer: [NA]

Justification: This paper is theoretic-focused and does not include experiments.

Guidelines:

- The answer NA means that the paper does not include experiments.
- The authors should answer "Yes" if the results are accompanied by error bars, confidence intervals, or statistical significance tests, at least for the experiments that support the main claims of the paper.
- The factors of variability that the error bars are capturing should be clearly stated (for example, train/test split, initialization, random drawing of some parameter, or overall run with given experimental conditions).
- The method for calculating the error bars should be explained (closed form formula, call to a library function, bootstrap, etc.)
- The assumptions made should be given (e.g., Normally distributed errors).
- It should be clear whether the error bar is the standard deviation or the standard error of the mean.

- It is OK to report 1-sigma error bars, but one should state it. The authors should preferably report a 2-sigma error bar than state that they have a 96% CI, if the hypothesis of Normality of errors is not verified.
- For asymmetric distributions, the authors should be careful not to show in tables or figures symmetric error bars that would yield results that are out of range (e.g. negative error rates).
- If error bars are reported in tables or plots, The authors should explain in the text how they were calculated and reference the corresponding figures or tables in the text.

## 8. Experiments compute resources

Question: For each experiment, does the paper provide sufficient information on the computer resources (type of compute workers, memory, time of execution) needed to reproduce the experiments?

Answer: [NA]

Justification: This paper is theoretic-focused and does not include experiments.

Guidelines:

- The answer NA means that the paper does not include experiments.
- The paper should indicate the type of compute workers CPU or GPU, internal cluster, or cloud provider, including relevant memory and storage.
- The paper should provide the amount of compute required for each of the individual experimental runs as well as estimate the total compute.
- The paper should disclose whether the full research project required more compute than the experiments reported in the paper (e.g., preliminary or failed experiments that didn't make it into the paper).

## 9. Code of ethics

Question: Does the research conducted in the paper conform, in every respect, with the NeurIPS Code of Ethics <https://neurips.cc/public/EthicsGuidelines>?

Answer: [Yes]

Justification: The research conforms with the NeurIPS Code of Ethics.

Guidelines:

- The answer NA means that the authors have not reviewed the NeurIPS Code of Ethics.
- If the authors answer No, they should explain the special circumstances that require a deviation from the Code of Ethics.
- The authors should make sure to preserve anonymity (e.g., if there is a special consideration due to laws or regulations in their jurisdiction).

## 10. Broader impacts

Question: Does the paper discuss both potential positive societal impacts and negative societal impacts of the work performed?

Answer: [NA]

Justification: This work is theoretical, and we do not foresee any negative ethical or societal outcomes.

Guidelines:

- The answer NA means that there is no societal impact of the work performed.
- If the authors answer NA or No, they should explain why their work has no societal impact or why the paper does not address societal impact.
- Examples of negative societal impacts include potential malicious or unintended uses (e.g., disinformation, generating fake profiles, surveillance), fairness considerations (e.g., deployment of technologies that could make decisions that unfairly impact specific groups), privacy considerations, and security considerations.

- The conference expects that many papers will be foundational research and not tied to particular applications, let alone deployments. However, if there is a direct path to any negative applications, the authors should point it out. For example, it is legitimate to point out that an improvement in the quality of generative models could be used to generate deepfakes for disinformation. On the other hand, it is not needed to point out that a generic algorithm for optimizing neural networks could enable people to train models that generate Deepfakes faster.
- The authors should consider possible harms that could arise when the technology is being used as intended and functioning correctly, harms that could arise when the technology is being used as intended but gives incorrect results, and harms following from (intentional or unintentional) misuse of the technology.
- If there are negative societal impacts, the authors could also discuss possible mitigation strategies (e.g., gated release of models, providing defenses in addition to attacks, mechanisms for monitoring misuse, mechanisms to monitor how a system learns from feedback over time, improving the efficiency and accessibility of ML).

## 11. Safeguards

Question: Does the paper describe safeguards that have been put in place for responsible release of data or models that have a high risk for misuse (e.g., pretrained language models, image generators, or scraped datasets)?

Answer: [NA]

Justification: This work is theoretical, and we do not involve data and models.

Guidelines:

- The answer NA means that the paper poses no such risks.
- Released models that have a high risk for misuse or dual-use should be released with necessary safeguards to allow for controlled use of the model, for example by requiring that users adhere to usage guidelines or restrictions to access the model or implementing safety filters.
- Datasets that have been scraped from the Internet could pose safety risks. The authors should describe how they avoided releasing unsafe images.
- We recognize that providing effective safeguards is challenging, and many papers do not require this, but we encourage authors to take this into account and make a best faith effort.

## 12. Licenses for existing assets

Question: Are the creators or original owners of assets (e.g., code, data, models), used in the paper, properly credited and are the license and terms of use explicitly mentioned and properly respected?

Answer: [NA]

Justification: This work is theoretical, and no existing assets are involved in this paper.

Guidelines:

- The answer NA means that the paper does not use existing assets.
- The authors should cite the original paper that produced the code package or dataset.
- The authors should state which version of the asset is used and, if possible, include a URL.
- The name of the license (e.g., CC-BY 4.0) should be included for each asset.
- For scraped data from a particular source (e.g., website), the copyright and terms of service of that source should be provided.
- If assets are released, the license, copyright information, and terms of use in the package should be provided. For popular datasets, [paperswithcode.com/datasets](https://paperswithcode.com/datasets) has curated licenses for some datasets. Their licensing guide can help determine the license of a dataset.
- For existing datasets that are re-packaged, both the original license and the license of the derived asset (if it has changed) should be provided.

- If this information is not available online, the authors are encouraged to reach out to the asset’s creators.

### 13. New assets

Question: Are new assets introduced in the paper well documented and is the documentation provided alongside the assets?

Answer: [NA]

Justification: This work is theoretical, and no new assets are involved in this paper.

Guidelines:

- The answer NA means that the paper does not release new assets.
- Researchers should communicate the details of the dataset/code/model as part of their submissions via structured templates. This includes details about training, license, limitations, etc.
- The paper should discuss whether and how consent was obtained from people whose asset is used.
- At submission time, remember to anonymize your assets (if applicable). You can either create an anonymized URL or include an anonymized zip file.

### 14. Crowdsourcing and research with human subjects

Question: For crowdsourcing experiments and research with human subjects, does the paper include the full text of instructions given to participants and screenshots, if applicable, as well as details about compensation (if any)?

Answer: [NA]

Justification: This work does not involve crowdsourcing nor research with human subjects.

Guidelines:

- The answer NA means that the paper does not involve crowdsourcing nor research with human subjects.
- Including this information in the supplemental material is fine, but if the main contribution of the paper involves human subjects, then as much detail as possible should be included in the main paper.
- According to the NeurIPS Code of Ethics, workers involved in data collection, curation, or other labor should be paid at least the minimum wage in the country of the data collector.

### 15. Institutional review board (IRB) approvals or equivalent for research with human subjects

Question: Does the paper describe potential risks incurred by study participants, whether such risks were disclosed to the subjects, and whether Institutional Review Board (IRB) approvals (or an equivalent approval/review based on the requirements of your country or institution) were obtained?

Answer: [NA]

Justification: This work does not involve crowdsourcing nor research with human subjects.

Guidelines:

- The answer NA means that the paper does not involve crowdsourcing nor research with human subjects.
- Depending on the country in which research is conducted, IRB approval (or equivalent) may be required for any human subjects research. If you obtained IRB approval, you should clearly state this in the paper.
- We recognize that the procedures for this may vary significantly between institutions and locations, and we expect authors to adhere to the NeurIPS Code of Ethics and the guidelines for their institution.
- For initial submissions, do not include any information that would break anonymity (if applicable), such as the institution conducting the review.

### 16. Declaration of LLM usage



792 Question: Does the paper describe the usage of LLMs if it is an important, original, or  
793 non-standard component of the core methods in this research? Note that if the LLM is used  
794 only for writing, editing, or formatting purposes and does not impact the core methodology,  
795 scientific rigorousness, or originality of the research, declaration is not required.

796 Answer: [NA]

797 Justification: The core method development in this research does not involve LLMs as any  
798 important, original, or non-standard components.

799 Guidelines:

- 800 • The answer NA means that the core method development in this research does not  
801 involve LLMs as any important, original, or non-standard components.
- 802 • Please refer to our LLM policy (<https://neurips.cc/Conferences/2025/LLM>)  
803 for what should or should not be described.

## 804 A Omitted Details in Section 2 and Section 3

805 As mentioned, Lu et al. [2025] define  $c_\phi$  as  $\min\{d - d_\phi^{\text{self}}, d - d_\phi^{\text{unif}} + 1\}$  for all  $\phi \in \mathcal{S}$ , while our  
 806 definition for  $\phi \in \mathcal{S} \setminus \Phi_b$  is different. The following shows that ours is strictly better.

807 **Proposition A.1.** *For any  $\phi \in \mathcal{S}$ , we have  $c_\phi \leq \min\{d - d_\phi^{\text{self}}, d - d_\phi^{\text{unif}} + 1\}$ . Moreover, there exists  
 808  $\phi \in \mathcal{S}$  such that  $c_\phi = \mathcal{O}(1)$  and  $\min\{d - d_\phi^{\text{self}}, d - d_\phi^{\text{unif}} + 1\} = \Omega(d)$ .*

809 *Proof of Proposition A.1.* Since

$$\begin{aligned} c_\phi &= \min_{q \in Q_\phi} \mathbb{E}_{\phi' \sim q} [c_{\phi'}] = \min_{q \in Q_\phi} \mathbb{E}_{\phi' \sim q} [\min\{d - d_{\phi'}^{\text{self}}, d - d_{\phi'}^{\text{unif}} + 1\}] \\ &\leq \min_{q \in Q_\phi} \min\{\mathbb{E}_{\phi' \sim q} [d - d_{\phi'}^{\text{self}}], \mathbb{E}_{\phi' \sim q} [d - d_{\phi'}^{\text{unif}} + 1]\} \\ &= \min\{\min_{q \in Q_\phi} \mathbb{E}_{\phi' \sim q} [d - d_{\phi'}^{\text{self}}], \min_{q \in Q_\phi} \mathbb{E}_{\phi' \sim q} [d - d_{\phi'}^{\text{unif}} + 1]\} \\ &= \min\{d - \text{trace}(\phi), d - \max_{q \in Q_\phi} \mathbb{E}_{\phi' \sim q} [d_{\phi'}^{\text{unif}}] + 1\}, \end{aligned}$$

810 it suffices to prove  $d_\phi^{\text{self}} \leq \text{trace}(\phi)$  and  $d_\phi^{\text{unif}} \leq \max_{q \in Q_\phi} \mathbb{E}_{\phi' \sim q} [d_{\phi'}^{\text{unif}}]$  separately. First, by the  
 811 definition of  $d_\phi^{\text{self}}$ , it directly follows that  $d_\phi^{\text{self}} \leq \text{trace}(\phi)$ .

812 Second, we construct a distribution  $p \in \Delta(\Phi_b)$  such that  $\phi = \sum_{\phi' \in \Phi_b} p(\phi') \phi'$  and show that  
 813  $\sum_{\phi' \in \Phi_b} p(\phi') d_{\phi'}^{\text{unif}} \geq d_\phi^{\text{unif}}$ , which in turn implies that  $\max_{q \in Q_\phi} \mathbb{E}_{\phi' \sim q} [d_{\phi'}^{\text{unif}}] \geq d_\phi^{\text{unif}}$ . Suppose that  
 814 the most frequent element in  $\{\phi(e_1), \dots, \phi(e_d)\}$  is  $q \in \Delta(d)$  and  $\phi(e_j) = q$  for all  $j \in \mathcal{A} \subseteq [d]$  with  
 815  $|\mathcal{A}| = d_\phi^{\text{unif}}$ . Then, we can write  $\phi$  as  $\phi = \sum_{i=1}^d q_i \phi_i$ , where  $\phi_i(e_j) = e_i$  for all  $j \in \mathcal{A}$  and  $\phi_i(e_j) =$   
 816  $\phi(e_j)$  for all  $j \notin \mathcal{A}$ . This guarantees that  $d_{\phi_i}^{\text{unif}} \geq d_\phi^{\text{unif}}$ . Furthermore, let  $\phi_i = \sum_{\phi'_i \in \Phi_b} p_i(\phi'_i) \cdot \phi'_i$   
 817 be any convex decomposition of  $\phi_i$ , and note that for any  $\phi'_i$  in the support of  $p_i$ , we must have  
 818  $\phi'_i(e_j) = e_i$  for all  $j \in \mathcal{A}$ , meaning that  $d_{\phi'_i}^{\text{unif}} \geq d_{\phi_i}^{\text{unif}}$ . Now we have constructed a convex combination  
 819 for  $\phi$ :

$$\phi = \sum_{i=1}^d q_i \phi_i = \sum_{i=1}^d \sum_{\phi'_i \in \Phi_b} q_i \cdot p_i(\phi'_i) \cdot \phi'_i$$

820 and consequently,

$$d_\phi^{\text{unif}} \leq \sum_{i=1}^d q_i \cdot d_{\phi_i}^{\text{unif}} \leq \sum_{i=1}^d \sum_{\phi'_i \in \Phi_b} q_i \cdot p_i(\phi'_i) \cdot d_{\phi'_i}^{\text{unif}} \leq \max_{q \in Q_\phi} \mathbb{E}_{\phi' \sim q} [d_{\phi'}^{\text{unif}}].$$

821 This proves that  $d_\phi^{\text{unif}} \leq \max_{q \in Q_\phi} \mathbb{E}_{\phi' \sim q} [d_{\phi'}^{\text{unif}}]$ . Combining with  $d_\phi^{\text{self}} \leq \text{trace}(\phi)$ , we have shown  
 822  $c_\phi \leq \min\{d - d_\phi^{\text{self}}, d - d_\phi^{\text{unif}} + 1\}$ .

823 Moreover, the complexity measures  $c_\phi$  and  $\min\{d - d_\phi^{\text{self}}, d - d_\phi^{\text{unif}} + 1\}$  can differ significantly in  
 824 some cases. For example, when  $\phi_1$  is a row-stochastic matrix with all diagonal entries equal to  
 825  $1 - \varepsilon$  for small  $\varepsilon > 0$  (implying each row's off-diagonal entries sum to  $\varepsilon$ ),  $\text{trace}(\phi_1)$  is  $(1 - \varepsilon)d$   
 826 while  $d_{\phi_1}^{\text{self}}$  is 0. Similarly, when  $\phi_2 = (1 - \varepsilon) \cdot \mathbf{1}_d \cdot e_1^\top + \varepsilon \mathbf{I}$ , it can be verified that  $d_{\phi_2}^{\text{unif}} = 1$  and  
 827  $\max_{q \in Q_{\phi_2}} \mathbb{E}_{\phi' \sim q} [d_{\phi'}^{\text{unif}}] = (1 - \varepsilon)d + \varepsilon = d - (d - 1)\varepsilon$ . With  $\varepsilon < \frac{1}{d}$ , we have  $c_\phi = \mathcal{O}(1)$  and  
 828  $\min\{d - d_\phi^{\text{self}}, d - d_\phi^{\text{unif}} + 1\} = \Omega(d)$  for  $\phi = \phi_1, \phi_2$ .  $\square$

829 Next, we prove Theorem 3.3.

830 *Proof of Theorem 3.3.* First, for  $\pi_{\psi^{d+1}}$ , we have for any  $\phi \in \Phi_b$ ,

$$\begin{aligned} \pi_{\psi^{d+1}}(\phi) &= \left(1 - \frac{1}{d}\right)^{d_\phi^{\text{self}}} \cdot \left(\frac{1}{d(d-1)}\right)^{d - d_\phi^{\text{self}}} \\ &\geq \left(1 - \frac{1}{d}\right)^{d_\phi^{\text{self}}} \cdot \frac{1}{d^{2(d - d_\phi^{\text{self}})}}, \end{aligned}$$

831 which leads to

$$\log \frac{1}{\pi_{\psi^{d+1}}(\phi)} \leq 2(d - d_{\phi}^{\text{self}}) \log d + 1, \quad (4)$$

832 since  $-d_{\phi}^{\text{self}} \log(1 - \frac{1}{d}) \leq -d \log(1 - \frac{1}{d}) \leq 1$  for  $d \geq 2$ . Then, for  $\phi \in \Phi_b$ , assume that the most  
833 frequent element in the set  $\{\phi(e_1), \dots, \phi(e_d)\}$  is  $e_r$ . It holds that

$$\begin{aligned} \pi_{\psi^r}(\phi) &= \left(1 - \frac{1}{d}\right)^{d_{\phi}^{\text{unif}}} \cdot \left(\frac{1}{d(d-1)}\right)^{d-d_{\phi}^{\text{unif}}} \\ &\geq \left(1 - \frac{1}{d}\right)^{d_{\phi}^{\text{unif}}} \cdot \frac{1}{d^{2(d-d_{\phi}^{\text{unif}})}}, \end{aligned}$$

834 which leads to

$$\log \frac{1}{\pi_{\psi^r}(\phi)} \leq 2(d - d_{\phi}^{\text{unif}}) \log d + 1, \quad (5)$$

835 since  $-d_{\phi}^{\text{unif}} \log(1 - \frac{1}{d}) \leq -d \log(1 - \frac{1}{d}) \leq 1$  for  $d \geq 2$ . Using the definition of  $\pi$  in [Definition 3.2](#)  
836 and combining [Eq. \(4\)](#) and [Eq. \(5\)](#), we have

$$\begin{aligned} \log \frac{1}{\pi(\phi)} &\leq \min \left\{ \log \frac{1}{\frac{1}{2} \cdot \pi_{\psi^{d+1}}(\phi)}, \log \frac{1}{\frac{1}{2d} \cdot \pi_{\psi^r}(\phi)} \right\} \\ &\leq \min \{ 2(d - d_{\phi}^{\text{unif}}) \log d + 1 + \log 2, 2(d - d_{\phi}^{\text{unif}}) \log d + 1 + \log(2d) \} \\ &\leq 2 \min \{ d - d_{\phi}^{\text{self}}, d - d_{\phi}^{\text{unif}} + 1 \} \cdot \log d + 2. \end{aligned} \quad (6)$$

837 This completes the proof of the first statement that  $\log \left( \frac{1}{\pi(\phi)} \right) \leq 2 + 2c_{\phi} \log d$ .

838 Next, we prove that  $\text{Reg}(\phi) = \mathcal{O} \left( \sqrt{(1 + c_{\phi} \log d)T} + B \right)$  for all  $\phi \in \mathcal{S}$  when the condition [Eq. \(3\)](#)  
839 holds. Fix a row-stochastic matrix  $\phi \in \mathcal{S}$  and let  $q \in Q_{\phi}$  be such that  $c_{\phi} = \mathbb{E}_{\phi' \sim q}[c_{\phi'}]$ . By linearity  
840 of  $\text{Reg}(\phi)$  in  $\phi$ , we have  $\text{Reg}(\phi) = \mathbb{E}_{\phi' \sim q}[\text{Reg}(\phi')]$ , and thus

$$\begin{aligned} \text{Reg}(\phi) &\leq \mathbb{E}_{\phi' \sim q} \left[ \sqrt{T \log \left( \frac{1}{\pi(\phi)} \right)} + B \right] && \text{(by Eq. (3))} \\ &\leq \mathbb{E}_{\phi' \sim q} \left[ \sqrt{T(2c_{\phi'} \log d + 2)} + B \right] && \text{(by Eq. (6))} \\ &\leq \sqrt{T(2 \cdot \mathbb{E}_{\phi' \sim q}[c_{\phi'}] \log d + 2)} + B && \text{(by Jensen's inequality)} \\ &= \mathcal{O} \left( \sqrt{(1 + c_{\phi} \log d)T} + B \right). \end{aligned}$$

841 This completes the proof. □

## 842 B Omitted Details in [Section 4](#)

843 In this section, we show the omitted proofs in [Section 4](#).

### 844 B.1 Proof of [Theorem 4.1](#)

845 First, we provide the general form of vanilla MWU for an arbitrary and finite action space  $\mathcal{A}$  in  
846 [Algorithm 5](#). The following result is well-known for MWU, and we provide a proof for completeness.  
847

848 **Lemma B.1.** *[Algorithm 5](#) ensures that for any comparator  $q \in \Delta(\mathcal{A})$ , we have*

$$\sum_{t=1}^T \langle x_t - q, \ell_t \rangle \leq \frac{\text{KL}(q, x_1)}{\eta} + \eta \sum_{t=1}^T \|\ell_t\|_{\infty}^2.$$

---

**Algorithm 5** MWU

---

**Input:** learning rate  $\eta > 0$ ; finite action space  $\mathcal{A}$ ; prior distribution  $x_1 \in \Delta(\mathcal{A})$ .

**for**  $t = 1, 2, \dots, T$  **do**

    Play  $x_t$  and receive loss  $\ell_t \in [0, 1]^{|\mathcal{A}|}$ .

    Update  $x_{t+1}$  such that  $x_{t+1,i} \propto x_{t,i} \exp(-\eta \ell_{t,i})$  for all  $i \in \mathcal{A}$ .

---

849 *Proof of Lemma B.1.* We aim to show that for all  $t \in [T]$ ,

$$\langle x_t - q, \ell_t \rangle = \frac{1}{\eta} (\text{KL}(q, x_t) - \text{KL}(q, x_{t+1}) + \text{KL}(x_t, x_{t+1})). \quad (7)$$

850 Note that the update rule of MWU implies that  $x_{t+1,i} = \frac{x_{t,i} \exp(-\eta \ell_{t,i})}{\sum_{j \in \mathcal{A}} x_{t,j} \exp(-\eta \ell_{t,j})}$  with prior distribution  
851  $x_1$ . Direct calculation shows that

$$\begin{aligned} & \frac{1}{\eta} (\text{KL}(q, x_t) - \text{KL}(q, x_{t+1}) + \text{KL}(x_t, x_{t+1})) \\ &= \frac{1}{\eta} \sum_{i \in \mathcal{A}} (x_{t,i} - q_i) \cdot \log \frac{x_{t,i}}{x_{t+1,i}} \\ &= \sum_{i \in \mathcal{A}} (x_{t,i} - q_i) \left( \ell_{t,i} + \frac{1}{\eta} \log \left( \sum_{j \in \mathcal{A}} x_{t,j} \exp(-\eta \ell_{t,j}) \right) \right) \\ &= \langle x_t - q, \ell_t \rangle. \end{aligned}$$

852 Summing Eq. (7) for all  $t \in [T]$ , we obtain that

$$\sum_{t=1}^T \langle x_t - q, \ell_t \rangle = \frac{1}{\eta} (\text{KL}(q, x_1) - \text{KL}(q, x_{T+1})) + \frac{1}{\eta} \sum_{t=1}^T \text{KL}(x_t, x_{t+1}). \quad (8)$$

853 Next, we bound  $\text{KL}(x_t, x_{t+1})$  as shown below.

$$\begin{aligned} \text{KL}(x_t, x_{t+1}) &= \sum_{i \in \mathcal{A}} x_{t,i} \log \frac{x_{t,i}}{x_{t+1,i}} \\ &= \sum_{i \in \mathcal{A}} \eta x_{t,i} \ell_{t,i} + x_{t,i} \log \left( \sum_{j \in \mathcal{A}} x_{t,j} \exp(-\eta \ell_{t,j}) \right) \\ &\leq \sum_{i \in \mathcal{A}} \eta x_{t,i} \ell_{t,i} + x_{t,i} \log \left( \sum_{j \in \mathcal{A}} x_{t,j} (1 - \eta \ell_{t,j} + \eta^2 \ell_{t,j}^2) \right) \\ &\quad \text{(since } \exp(-x) \leq 1 - x + x^2 \text{ for } x \geq -1) \\ &= \sum_{i \in \mathcal{A}} \eta x_{t,i} \ell_{t,i} + x_{t,i} \log \left( 1 - \eta \sum_{j \in \mathcal{A}} x_{t,j} \ell_{t,j} + \eta^2 \sum_{j \in \mathcal{A}} x_{t,j} \ell_{t,j}^2 \right) \\ &\leq \eta \sum_{i \in \mathcal{A}} x_{t,i} \ell_{t,i} - \eta \sum_{j \in \mathcal{A}} x_{t,j} \ell_{t,j} + \eta^2 \sum_{j \in \mathcal{A}} x_{t,j} \ell_{t,j}^2 \quad \text{(since } \log(1+x) \leq x \text{ for all } x) \\ &\leq \eta^2 \|\ell_t\|_\infty^2. \end{aligned}$$

854 Substituting this in Eq. (8) and using the fact that KL divergence is always non-negative, we get,

$$\sum_{t=1}^T \langle x_t - q, \ell_t \rangle \leq \frac{\text{KL}(q, x_1)}{\eta} + \eta \sum_{t=1}^T \|\ell_t\|_\infty^2.$$

855 □

856 The following lemma proves the statement in Section 4 that the optimal learning rate of interest  
857 always lies in  $[\eta_h, 2\eta_h]$  for certain  $h \in [M]$ , where  $M = 2\lceil \log_2 d \rceil$ .

858 **Lemma B.2.** For any  $\phi \in \mathcal{S}$  and  $q \in Q_\phi$ , there exists  $h \in [M]$ , such that  $\eta_h \leq$   
859  $\max \left\{ \sqrt{\frac{\text{KL}(q, \pi)}{T}}, \sqrt{\frac{2}{T}} \right\} \leq 2\eta_h$ .

860 *Proof of Lemma B.2.* For any  $\phi \in \mathcal{S}$  and  $q \in Q_\phi$ , we have  $\text{KL}(q, \pi) = \sum_{\phi' \in \Phi_b} q(\phi') \log \frac{q(\phi')}{\pi(\phi')} \leq$   
861  $\sum_{\phi' \in \Phi_b} q(\phi') \log \frac{1}{\pi(\phi')} \leq \log \frac{1}{\min_{\phi' \in \Phi_b} \pi(\phi')} \leq 2d \log d + 1$ , where the last inequality follows from  
862 the fact that  $\min_{\phi' \in \Phi_b} \pi(\phi') \geq \min_{\phi' \in \Phi_b} \frac{1}{2} \pi_{\psi^{d+1}}(\phi') \geq \frac{1}{2} \cdot \left( \frac{1}{d(d-1)} \right)^d$ . Therefore, we have

$$\min_{h \in [M]} 2^h = 2 \leq \max\{\text{KL}(q, \pi), 2\} \leq 2d \log d + 1 \leq d^2 = 2^{2 \log_2 d} \leq \max_{h \in [M]} 2^h,$$

863 and thus, there exists an  $h \in [M]$ , such that  $\eta_h \leq \max \left\{ \sqrt{\frac{\text{KL}(q, \pi)}{T}}, \sqrt{\frac{2}{T}} \right\} \leq 2\eta_h$ .  $\square$

864 Now, we provide the proof of the adaptive  $\Phi$ -regret bound attained by the Meta MWU algorithm  
865 (Algorithm 2) in Section 4.

866 *Proof of Theorem 4.1.* Since  $p_t$  is a stationary distribution of  $\phi_t$ , we have  $\text{Reg}(\phi) =$   
867  $\sum_{t=1}^T \langle p_t - \phi(p_t), \ell_t \rangle = \sum_{t=1}^T \langle \phi_t(p_t) - \phi(p_t), \ell_t \rangle = \sum_{t=1}^T \langle \phi_t - \phi, p_t \ell_t^\top \rangle$ . Further using the  
868 definition of  $\phi_t$  from Algorithm 2, we can express  $\text{Reg}(\phi)$  as the sum of the base and meta algo-  
869 rithms' regret as follows:

$$\begin{aligned} \text{Reg}(\phi) &= \sum_{t=1}^T \left\langle \sum_{h=1}^M w_{t,h} \phi_t^h - \phi, p_t \ell_t^\top \right\rangle \\ &= \sum_{t=1}^T \langle w_t - e_{h^*}, \ell_t^w \rangle + \sum_{t=1}^T \langle \phi_t^{h^*} - \phi, p_t \ell_t^\top \rangle, \end{aligned}$$

870 where  $\ell_{t,h}^w = p_t^\top \phi_t^h \ell_t \in [0, 1]$  and  $h^* \in [M]$  is the index of an arbitrary base learner to be specified.

871 Regret of the meta MWU algorithm is bounded as  $\sum_{t=1}^T \langle w_t - e_{h^*}, \ell_t^w \rangle \leq \mathcal{O}(\sqrt{T \log \log d})$  from  
872 Lemma B.1 since the prior is the uniform distribution over the  $2^{\lceil \log_2 d \rceil}$  base algorithms.

873 Regret of the base MWU algorithm  $\mathcal{B}_{h^*}$  is  $\sum_{t=1}^T \langle \phi_t^{h^*} - \phi, p_t \ell_t^\top \rangle \leq \frac{\text{KL}(q, \pi)}{\eta_{h^*}} + \eta_{h^*} T$  for any  
874  $q \in Q_\phi$  based on Lemma B.1 and Algorithm 1. Choosing  $h^*$  according to Lemma B.2, we  
875 get  $\sum_{t=1}^T \langle \phi_t^{h^*} - \phi, p_t \ell_t^\top \rangle \leq 3\sqrt{T \text{KL}(q, \pi)} + 2\sqrt{2T}$ . Thus, Algorithm 2 achieves  $\text{Reg}(\phi) =$   
876  $\mathcal{O}(\sqrt{T \text{KL}(q, \pi)} + \sqrt{T \log \log d})$  for all  $\phi \in \mathcal{S}$  and  $q \in Q_\phi$ .

877 By selecting  $q$  to be a one-hot vector that puts all weights on  $\phi$ , we obtain Eq. (3) with  $B =$   
878  $\mathcal{O}(\sqrt{T \log \log d})$  for any  $\phi \in \Phi_b$ . Combining with Theorem 3.3, we prove the desired bound of  
879  $\text{Reg}(\phi) = \mathcal{O}(\sqrt{(1 + c_\phi \log d)T} + \sqrt{T \log \log d})$  for all  $\phi \in \mathcal{S}$ .  $\square$

## 880 B.2 Quantile Regret

881 In this section, we show the near-optimal  $\varepsilon$ -quantile regret bound promised by Algorithm 2. The  
882  $\varepsilon$ -quantile regret [Chaudhuri et al., 2009] is defined as the difference between the cumulative loss of  
883 the learner and that of the  $\lceil \varepsilon d \rceil$ -th best expert, where  $\varepsilon \in [1/d, 1]$ . Let  $i_\varepsilon$  be the  $\lceil \varepsilon d \rceil$ -th best expert.  
884 Then, the  $\varepsilon$ -quantile regret is calculated as:

$$\text{Reg}_\varepsilon = \sum_{t=1}^T \langle p_t, \ell_t \rangle - \sum_{t=1}^T \ell_{t, i_\varepsilon}.$$

885 Negrea et al. [2021] prove the minimax bound for  $\varepsilon$ -quantile regret to be  $\mathcal{O}(\sqrt{T \log \frac{1}{\varepsilon}})$ . We show  
886 that our Algorithm 2 achieves a near-optimal rate for quantile regret using Theorem 4.1 and ideas  
887 similar to Remark 9.16 of [Orabona, 2019].



888 **Theorem B.3.** For all  $\varepsilon \in [1/d, 1]$ , [Algorithm 2](#) guarantees

$$\text{Reg}_\varepsilon \leq \mathcal{O} \left( \sqrt{T \log \frac{1}{\varepsilon}} + \sqrt{T \log \log d} \right).$$

889 *Proof of Theorem B.3.* We order the  $d$  experts in increasing order of their cumulative losses. Let  
 890  $q_\varepsilon$  be the probability distribution over these  $d$  experts with probability mass  $\frac{1}{\lceil \varepsilon d \rceil}$  on the first  $\lceil \varepsilon d \rceil$   
 891 experts in the ordered list and 0 on the remaining experts. Let  $\phi_\varepsilon = \mathbf{1} q_\varepsilon^\top$ , i.e., each row of  $\phi_\varepsilon$  is  $q_\varepsilon^\top$ .  
 892 We can also express it as  $\sum_{i=1}^d q_{\varepsilon,i} (\mathbf{1} e_i^\top)$ , a convex combination of binary swap matrices. Therefore,  
 893 it can be regarded as a distribution over the set  $\{\mathbf{1} e_1^\top, \dots, \mathbf{1} e_d^\top\}$ .

894 Next, we consider the probability assigned by  $\pi$  to the swap matrices in this set. For all  $i \in [d]$ ,  
 895  $\pi(\mathbf{1} e_i^\top) \geq \frac{1}{2d} \pi_{\psi^i}(\mathbf{1} e_i^\top) = \frac{1}{2d} (1 - \frac{1}{d})^d \geq \frac{1}{8d}$  for  $d \geq 2$ . Now, we show that comparing against  $\phi_\varepsilon$   
 896 gives us the desired bound for  $\varepsilon$ -quantile regret:

$$\begin{aligned} \text{Reg}_\varepsilon &= \sum_{t=1}^T \langle p_t, \ell_t \rangle - \sum_{t=1}^T \ell_{t, i_\varepsilon} \\ &\leq \sum_{t=1}^T \langle p_t - q_\varepsilon, \ell_t \rangle \\ &= \sum_{t=1}^T \langle \phi_t(p_t) - \phi_\varepsilon(p_t), \ell_t \rangle \quad (\text{since for all } p \in \Delta(d), \phi_\varepsilon(p) = q_\varepsilon) \\ &\leq \mathcal{O} \left( \sqrt{TKL(q_\varepsilon, \pi)} + \sqrt{T \log \log d} \right) \quad (\text{by Theorem 4.1}) \\ &= \mathcal{O} \left( \sqrt{T \sum_{i=1}^d q_{\varepsilon,i} \log \frac{q_{\varepsilon,i}}{\pi(\mathbf{1} e_i^\top)}} + \sqrt{T \log \log d} \right) \\ &\quad (\text{only the elements in } \{\mathbf{1} e_1^\top, \dots, \mathbf{1} e_d^\top\} \text{ have non-zero probability mass in } q_\varepsilon) \\ &\leq \mathcal{O} \left( \sqrt{T \log \frac{8d}{\lceil \varepsilon d \rceil}} + \sqrt{T \log \log d} \right) \quad (\text{since } q_{\varepsilon,i} = \frac{1}{\lceil \varepsilon d \rceil} \text{ for all } i \in [d]) \\ &\leq \mathcal{O} \left( \sqrt{T \log \frac{1}{\varepsilon}} + \sqrt{T \log \log d} \right). \end{aligned}$$

897 This completes the proof. □

### 898 B.3 Kernelized MWU

899 In this section, we first prove [Theorem 4.3](#), and then discuss how to further speed up [Algorithm 3](#).

#### 900 B.3.1 Proof of Theorem 4.3

901 *Proof.* The kernel function ([Definition 4.2](#)) used in [Algorithm 3](#) can be computed as follows:

$$\begin{aligned} K(B, A) &= \sum_{\phi \in \Phi_b} \pi(\phi) \prod_{i,j \in [d]: \phi_{ij}=1} B_{ij} A_{ij} \\ &= \frac{1}{2d} \sum_{k=1}^d \sum_{\phi \in \Phi_b} \prod_{i,j \in [d]: \phi_{ij}=1} \psi_{ij}^k B_{ij} A_{ij} + \frac{1}{2} \sum_{\phi \in \Phi_b} \prod_{i,j \in [d]: \phi_{ij}=1} \psi_{ij}^{d+1} B_{ij} A_{ij} \\ &\quad (\text{from Eq. (1)}) \\ &= \frac{1}{2d} \sum_{k=1}^d \prod_{i=1}^d \sum_{j=1}^d \psi_{ij}^k B_{ij} A_{ij} + \frac{1}{2} \prod_{i=1}^d \sum_{j=1}^d \psi_{ij}^{d+1} B_{ij} A_{ij}. \end{aligned}$$

902 Thus, it takes  $\mathcal{O}(d^3)$  time to evaluate it.

903 To prove the equivalence between [Algorithm 1](#) and [Algorithm 3](#), we denote  $J = \mathbf{1}\mathbf{1}^\top$ ,  $\bar{J}_{ij} = J - e_i e_j^\top$ ,  
 904 and  $l_{t,\phi} = \langle \phi, p_t \ell_t^\top \rangle$ . With some abuse in notation, for  $\phi \in \Phi_b$  and  $i \in [d]$ , we denote by  $\phi(i)$  the  
 905 unique index  $j \in [d]$  such that  $\phi_{ij} = 1$ .

906 According to MWU ([Algorithm 1](#)),  $q_t(\phi) = \frac{\pi(\phi) \exp(-\eta \sum_{\tau=1}^{t-1} l_{\tau,\phi})}{\sum_{\phi' \in \Phi_b} \pi(\phi') \exp(-\eta \sum_{\tau=1}^{t-1} l_{\tau,\phi'})}$ , for all  $\phi \in \Phi_b$ . From  
 907 Kernelized MWU ([Algorithm 3](#)), we have

$$\begin{aligned} K(B_t, J) &= \sum_{\phi \in \Phi_b} \pi(\phi) \prod_{i,j \in [d]: \phi_{ij}=1} (B_t)_{ij} J_{ij} \\ &= \sum_{\phi \in \Phi_b} \pi(\phi) \prod_{i,j \in [d]: \phi_{ij}=1} \exp\left(-\eta \sum_{\tau=1}^{t-1} p_{\tau,i} \ell_{\tau,j}\right) \end{aligned}$$

908 and

$$\begin{aligned} K(B_t, \bar{J}_{ij}) &= \sum_{\phi \in \Phi_b} \pi(\phi) \prod_{u,v \in [d]: \phi_{uv}=1} (B_t)_{uv} (\bar{J}_{ij})_{uv} \\ &= \sum_{\phi \in \Phi_b: \phi(i) \neq j} \pi(\phi) \prod_{u,v \in [d]: \phi_{uv}=1} \exp\left(-\eta \sum_{\tau=1}^{t-1} p_{\tau,u} \ell_{\tau,v}\right). \end{aligned}$$

909 So, we have

$$\begin{aligned} K(B_t, J) - K(B_t, \bar{J}_{ij}) &= \sum_{\phi \in \Phi_b: \phi(i)=j} \pi(\phi) \prod_{u,v \in [d]: \phi_{uv}=1} \exp\left(-\eta \sum_{\tau=1}^{t-1} p_{\tau,u} \ell_{\tau,v}\right) \\ &= \sum_{\phi \in \Phi_b: \phi(i)=j} \pi(\phi) \exp\left(-\eta \sum_{\tau=1}^{t-1} l_{\tau,\phi}\right) \\ &= \sum_{\phi \in \Phi_b} \pi(\phi) \exp\left(-\eta \sum_{\tau=1}^{t-1} l_{\tau,\phi}\right) \phi_{ij}. \end{aligned}$$

910 Therefore, for all  $i, j \in [d]$ , we get,

$$\begin{aligned} (\phi_t)_{ij} &= \frac{K(B_t, J) - K(B_t, \bar{J}_{ij})}{K(B_t, J)} \\ &= \frac{\sum_{\phi \in \Phi_b} \pi(\phi) \exp\left(-\eta \sum_{\tau=1}^{t-1} l_{\tau,\phi}\right) \phi_{ij}}{\sum_{\phi \in \Phi_b} \pi(\phi) \exp\left(-\eta \sum_{\tau=1}^{t-1} l_{\tau,\phi}\right)} \\ &= \sum_{\phi \in \Phi_b} q_t(\phi) \phi_{ij}, \end{aligned}$$

911 giving us the required equivalence:  $\phi_t = \sum_{\phi \in \Phi_b} q_t(\phi) \cdot \phi = \mathbb{E}_{\phi \sim q_t}[\phi]$ . □

### 912 **B.3.2 More Efficient Implementation of [Algorithm 3](#)**

913 Based on [Theorem B.4](#), each iteration of [Algorithm 3](#) can be implemented in  $\mathcal{O}(d^5)$  time. However,  
 914 we show below that by reusing intermediate statistics, this can be improved to  $\mathcal{O}(d^3)$ .

915 **Theorem B.4.** *[Algorithm 6](#) outputs the same  $\phi_t$  as [Algorithm 3](#) and has a time complexity of  $\mathcal{O}(d^3)$   
 916 per iteration.*

917 *Proof of [Theorem B.4](#).* Similarly, we denote  $J = \mathbf{1}\mathbf{1}^\top$  and  $\bar{J}_{ij} = J - e_i e_j^\top$ . With some abuse in  
 918 notation, for  $\phi \in \Phi_b$  and  $i \in [d]$ , we denote by  $\phi(i)$  the unique index  $j \in [d]$  such that  $\phi_{ij} = 1$ .  
 919 Direct calculation shows that

$$K(B_t, J) = \sum_{\phi \in \Phi_b} \pi(\phi) \prod_{i,j \in [d]: \phi_{ij}=1} (B_t)_{ij} (J)_{ij}$$

---

**Algorithm 6** Faster Kernelized MWU with non-uniform prior
 

---

**Input:** learning rate  $\eta > 0$  and stochastic matrices  $\{\psi^k\}_{k=1}^{d+1}$  (defined in Eq. (2)).

**Initialize:**  $w_1^k = \frac{1}{2d}, \forall k \in [d], w_1^{d+1} = \frac{1}{2}, Q_1^k = \psi^k, \forall k \in [d+1]$ , and  $L_0 \in \mathbb{R}^{d \times d}$  as the all-zero matrix.

**for**  $t = 1, 2, \dots, T$  **do**

Compute  $\phi_t = \sum_{k=1}^{d+1} w_t^k Q_t^k$ , receive loss matrix  $p_t \ell_t^\top$ , and update  $L_t = L_{t-1} + p_t \ell_t^\top$ .

**for**  $k = 1, 2, \dots, d+1$  **do**

Update  $Q_{t+1}^k$  as:

$$(Q_{t+1}^k)_{ij} = \frac{\psi_{ij}^k \exp(-\eta(L_t)_{ij})}{\sum_{j=1}^d \psi_{ij}^k \exp(-\eta(L_t)_{ij})}, \quad (9)$$

and  $w_{t+1}^k$  as:

$$w_{t+1}^k \propto \begin{cases} \frac{1}{2d} \prod_{i=1}^d \sum_{j=1}^d \psi_{ij}^k \exp(-\eta(L_t)_{ij}) & \text{when } k \in [d], \\ \frac{1}{2} \prod_{i=1}^d \sum_{j=1}^d \psi_{ij}^k \exp(-\eta(L_t)_{ij}) & \text{when } k = d+1. \end{cases} \quad (10)$$

$$\begin{aligned} &= \sum_{\phi \in \Phi_b} \left( \frac{1}{2d} \sum_{k=1}^d \prod_{i,j \in [d]: \phi_{ij}=1} \psi_{ij}^k + \frac{1}{2} \prod_{i,j \in [d]: \phi_{ij}=1} \psi_{ij}^{d+1} \right) \prod_{i,j \in [d]: \phi_{ij}=1} \exp(-\eta(L_{t-1})_{ij}) \\ &= \frac{1}{2d} \sum_{k=1}^d \prod_{i=1}^d \sum_{j=1}^d \psi_{ij}^k \exp(-\eta(L_{t-1})_{ij}) + \frac{1}{2} \prod_{i=1}^d \sum_{j=1}^d \psi_{ij}^{d+1} \exp(-\eta(L_{t-1})_{ij}), \end{aligned}$$

920 where  $L_{t-1}$  is defined in Algorithm 6. Thus,  $K(B_t, J)$  is exactly the normalization factor when  
 921 computing  $w_t^k$  based on Eq. (10). Similarly, we have

$$\begin{aligned} K(B_t, \bar{J}_{ij}) &= \sum_{\phi \in \Phi_b} \pi(\phi) \prod_{u,v \in [d]: \phi_{uv}=1} (B_t)_{uv} (\bar{J}_{ij})_{uv} \\ &= \sum_{\phi \in \Phi_b} \left( \frac{1}{2d} \sum_{k=1}^d \prod_{u,v \in [d]: \phi_{uv}=1} \psi_{uv}^k + \frac{1}{2} \prod_{u,v \in [d]: \phi_{uv}=1} \psi_{uv}^{d+1} \right) \prod_{u,v \in [d]: \phi_{uv}=1} (B_t)_{uv} (\bar{J}_{ij})_{uv} \\ &= \sum_{\phi: \phi(i) \neq j} \left( \frac{1}{2d} \sum_{k=1}^d \prod_{u,v \in [d]: \phi_{uv}=1} \psi_{uv}^k + \frac{1}{2} \prod_{u,v \in [d]: \phi_{uv}=1} \psi_{uv}^{d+1} \right) \prod_{u,v \in [d]: \phi_{uv}=1} \exp(-\eta(L_{t-1})_{uv}). \end{aligned}$$

922 This implies:

$$\begin{aligned} &K(B_t, J) - K(B_t, \bar{J}_{ij}) \\ &= \sum_{\phi: \phi(i)=j} \left( \frac{1}{2d} \sum_{k=1}^d \prod_{u,v \in [d]: \phi_{uv}=1} \psi_{uv}^k + \frac{1}{2} \prod_{u,v \in [d]: \phi_{uv}=1} \psi_{uv}^{d+1} \right) \prod_{u,v \in [d]: \phi_{uv}=1} \exp(-\eta(L_{t-1})_{uv}) \\ &= \frac{1}{2d} \sum_{k=1}^d \psi_{ij}^k \exp(-\eta(L_{t-1})_{ij}) \sum_{\phi: \phi(i)=j} \prod_{u \neq i: \phi_{uv}=1} \psi_{uv}^k \exp(-\eta(L_{t-1})_{uv}) \\ &\quad + \frac{1}{2} \psi_{ij}^{d+1} \exp(-\eta(L_{t-1})_{ij}) \sum_{\phi: \phi(i)=j} \prod_{u \neq i: \phi_{uv}=1} \psi_{uv}^{d+1} \exp(-\eta(L_{t-1})_{uv}) \\ &= \frac{1}{2d} \sum_{k=1}^d \psi_{ij}^k \exp(-\eta(L_{t-1})_{ij}) \prod_{u \neq i} \sum_{v=1}^d \psi_{uv}^k \exp(-\eta(L_{t-1})_{uv}) \\ &\quad + \frac{1}{2} \psi_{ij}^{d+1} \exp(-\eta(L_{t-1})_{ij}) \prod_{u \neq i} \sum_{v=1}^d \psi_{uv}^{d+1} \exp(-\eta(L_{t-1})_{uv}) \end{aligned}$$

---

**Algorithm 7** Meta MWU Algorithm for Learning Multiple BM-Reductions

---

- 1 **Initialization:** Set learning rate  $\eta = \sqrt{\frac{\log((d+1) \cdot 2 \lceil \log_2 d \rceil)}{T}}$  and  $w_1 = \frac{1}{|\mathcal{U}|} \mathbf{1} \in \Delta(\mathcal{U})$ , where  $\mathcal{U} = [d+1] \times [M]$ ; initialize  $|\mathcal{U}|$  base-learner  $\mathcal{B}_{k,h}$ ,  $(k,h) \in \mathcal{U}$ , where  $\mathcal{B}_{k,h}$  is an instance of [Algorithm 8](#) with prior  $\psi^k$ , learning rate  $\eta_h = \sqrt{2^h/T}$ , and subroutine SubAlg being MWU ([Algorithm 5](#) with  $\mathcal{A} = [d]$ ).
  - for**  $t = 1, 2, \dots, T$  **do**
  - 2   Receive  $\phi_t^{k,h} \in \mathcal{S}$  from  $\mathcal{B}_{k,h}$  for each  $(k,h) \in \mathcal{U}$  and compute  $\phi_t = \sum_{(k,h) \in \mathcal{U}} w_{t,k,h} \phi_t^{k,h}$ .
  - 3   Play the stationary distribution  $p_t$  of  $\phi_t$  (that is,  $p_t = \phi_t(p_t)$ ) and receive loss  $\ell_t$ .
  - 4   Update  $w_{t+1}$  such that  $w_{t+1,k,h} \propto w_{t,k,h} \exp(-\eta \ell_{t,k,h}^w)$  where  $\ell_{t,k,h}^w = \langle \phi_t^{k,h}, p_t \ell_t^\top \rangle$ .
  - 5   Send loss matrix  $p_t \ell_t^\top$  to  $\mathcal{B}_{k,h}$  for each  $(k,h) \in \mathcal{U}$ .
- 

---

**Algorithm 8** Prior-Aware BM-Reduction

---

**Input:** a prior  $\psi \in \mathcal{S}$ , a learning rate  $\eta > 0$ , and an external regret minimization subroutine SubAlg.

- 1 **Initialize:**  $d$  instances of SubAlg, denoted by  $\text{SubAlg}_1, \dots, \text{SubAlg}_d$ , where  $\text{SubAlg}_k$  uses learning rate  $\eta$  and prior distribution  $\psi_k \in \Delta(d)$ .
  - for**  $t = 1, 2, \dots, T$  **do**
  - 2   Propose  $\phi_t \in \mathcal{S}$  where the  $k$ -th row  $\phi_{t,k} \in \Delta(d)$  is the output of  $\text{SubAlg}_k$ .
  - 3   Receive a loss matrix  $p_t \ell_t^\top$  and send the  $k$ -th row to  $\text{SubAlg}_k$  for each  $k \in [d]$ .
- 

$$= \frac{1}{2d} \sum_{k=1}^d (Q_t^k)_{ij} \prod_{u=1}^d \sum_{v=1}^d \psi_{uv}^k \exp(-\eta(L_{t-1})_{uv}) + \frac{1}{2} (Q_t^{d+1})_{ij} \prod_{u=1}^d \sum_{v=1}^d \psi_{uv}^{d+1} \exp(-\eta(L_{t-1})_{uv}),$$

923 where  $Q_t^k$  is defined in [Eq. \(9\)](#). Therefore, using the definition of  $w_t^k$  again, we have

$$\frac{K(B_t, J) - K(B_t, \bar{J}_{ij})}{K(B_t, J)} = \sum_{k=1}^{d+1} w_t^k (Q_t^k)_{ij}$$

924 where the left-hand side is how  $(\phi_t)_{ij}$  is defined in [Algorithm 3](#) and the right-hand side is how  $(\phi_t)_{ij}$   
 925 is defined in [Algorithm 6](#), establishing the claimed equivalence.

926 Computing each matrix  $Q_t^k$  takes  $\mathcal{O}(d^2)$  time and all the  $d+1$  weights  $w_t^k$  can be computed in  
 927  $\mathcal{O}(d^3)$  time. Thus, computing  $\phi_t$  takes  $\mathcal{O}(d^3)$  time.  $\square$

## 928 C Omitted Details in [Section 5](#)

929 First, we include the meta MWU algorithm discussed in [Section 5](#) in [Algorithm 7](#), which uses a  
 930 base algorithm shown in [Algorithm 8](#). We use  $\mathcal{U} \triangleq [d+1] \times [M]$  for notational convenience,  
 931 where  $M = 2 \lceil \log_2 d \rceil$ . We now show the guarantee for our proposed prior-aware BM-reduction  
 932 ([Algorithm 8](#)).

933 **Theorem C.1.** Suppose that  $\pi_\psi$  is a  $\psi$ -induced distribution as defined in [Definition 3.1](#). Then  
 934 [Algorithm 8](#) with prior  $\pi_\psi$ , learning rate  $\eta > 0$ , and SubAlg being MWU ([Algorithm 5](#) with  $\mathcal{A} = [d]$ )

935 guarantees  $\sum_{t=1}^T \langle \phi_t - \phi, p_t \ell_t^\top \rangle \leq \frac{\log \frac{1}{\pi_\psi(\phi)}}{\eta} + \eta T$  for all  $\phi \in \Phi_b$ .

936 *Proof of Theorem C.1.* First we decompose  $\sum_{t=1}^T \langle \phi_t - \phi, p_t \ell_t^\top \rangle$  as  $\sum_{t=1}^T \sum_{i=1}^d \langle \phi_{t,i} - \phi_{i,:}, p_{t,i} \ell_t \rangle$ .  
 937 For each  $i$ , based on the algorithm and [Lemma B.1](#), we have

$$\sum_{i=1}^d \langle \phi_{t,i} - \phi_{i,:}, p_{t,i} \ell_t \rangle \leq \frac{\log \frac{1}{\psi_{i,\phi(i)}}}{\eta} + \eta \sum_{i=1}^d p_{t,i}$$

938 where  $\phi(i)$  denotes the unique index  $j$  such that  $\phi_{ij} = 1$ . Noting that  $\sum_{i=1}^d \psi_{i,\phi(i)}$  is exactly  $\pi_\psi(\phi)$   
 939 by definition, we have thus proven

$$\sum_{t=1}^T \langle \phi_t - \phi, p_t \ell_t^\top \rangle \leq \sum_{i=1}^d \left( \frac{\log \frac{1}{\psi_{i,\phi(i)}}}{\eta} + \eta \sum_{t=1}^T p_{t,i} \right) = \frac{\log \frac{1}{\pi_\psi(\phi)}}{\eta} + \eta T.$$

941 Next, we provide the proof for the adaptive  $\Phi$ -regret achieved by [Algorithm 7](#).

942 *Proof of [Theorem 5.1](#).* Since  $p_t$  is a stationary distribution of  $\phi_t$ , we have  $\text{Reg}(\phi) =$   
 943  $\sum_{t=1}^T \langle p_t - \phi(p_t), \ell_t \rangle = \sum_{t=1}^T \langle \phi_t(p_t) - \phi(p_t), \ell_t \rangle = \sum_{t=1}^T \langle \phi_t - \phi, p_t \ell_t^\top \rangle$ . Using the definition  
 944 of  $\phi_t$  and  $\ell_t^w$  from [Algorithm 7](#), for any  $(k, h) \in \mathcal{U}$ , we decompose  $\text{Reg}(\phi)$  as

$$\begin{aligned} \text{Reg}(\phi) &= \sum_{t=1}^T \langle \phi_t - \phi, p_t \ell_t^\top \rangle \\ &= \sum_{t=1}^T \left\langle \sum_{(k,h) \in \mathcal{U}} w_{t,k,h} \phi_t^{k,h} - \phi, p_t \ell_t^\top \right\rangle \\ &= \sum_{t=1}^T \langle w_t - e_{k,h}, \ell_t^w \rangle + \sum_{t=1}^T \left\langle \phi_t^{k,h} - \phi, p_t \ell_t^\top \right\rangle. \end{aligned}$$

945 Applying [Lemma B.1](#), the first term can be bounded as

$$\sum_{t=1}^T \langle w_t - e_{k,h}, \ell_t^w \rangle \leq 2\sqrt{T \log((d+1) \cdot 2\lceil \log_2 d \rceil)} \leq 4\sqrt{T \log d}. \quad (11)$$

946 For the second term, by [Theorem C.1](#), it holds that

$$\sum_{t=1}^T \langle \phi_t^{k,h} - \phi, p_t \ell_t^\top \rangle \leq \frac{\log \frac{1}{\pi_{\psi^k}(\phi)}}{\eta_h} + \eta_h T. \quad (12)$$

947 Summing up [Eq. \(11\)](#) and [Eq. \(12\)](#), we can bound  $\text{Reg}(\phi)$  as

$$\text{Reg}(\phi) \leq \frac{\log \frac{1}{\pi_{\psi^k}(\phi)}}{\eta_h} + \eta_h T + 4\sqrt{T \log d}.$$

948 Since the above inequality holds for all  $k \in [d+1]$ , we have

$$\begin{aligned} \text{Reg}(\phi) &\leq \min_{k \in [d+1]} \frac{\log \frac{1}{\pi_{\psi^k}(\phi)}}{\eta_h} + \eta_h T + 4\sqrt{T \log d} \\ &= \frac{\log \frac{1}{\max_{k \in [d+1]} \pi_{\psi^k}(\phi)}}{\eta_h} + \eta_h T + 4\sqrt{T \log d} \\ &\leq \frac{\log \frac{1}{\pi(\phi)}}{\eta_h} + \eta_h T + 4\sqrt{T \log d}, \end{aligned} \quad (13)$$

949 by the definition of  $\pi$  ([Definition 3.2](#)). It is clear that [Eq. \(13\)](#) attains its minimum when  $\eta_h$  is

950  $\sqrt{\frac{\log \frac{1}{\pi(\phi)}}{T}}$ . Similar to [Lemma B.2](#), we now show that there exists  $h^*$  such that  $\eta_{h^*}$  is close to this

951 optimum. Since  $\psi_{ij}^k \geq \frac{1}{d^2}$  for all  $k \in [d+1]$  and  $i, j \in [d]$ , it holds that

$$\min_h 2^h = 2 \leq \max \left\{ \log \frac{1}{\pi(\phi)}, 2 \right\} \leq d^2 = 2^{2 \log_2 d} \leq \max_h 2^h$$

952 Therefore, there exists  $h^*$  such that

$$2^{h^*} \leq \max \left\{ \log \frac{1}{\pi(\phi)}, 2 \right\} \leq 2^{h^*+1},$$

953 and thus

$$\frac{\log \frac{1}{\pi(\phi)}}{\eta_{h^*}} + \eta_{h^*} T = \log \frac{1}{\pi(\phi)} \cdot \sqrt{\frac{T}{2^{h^*}}} + \sqrt{\frac{2^{h^*}}{T}} T \leq 3\sqrt{T \log \frac{1}{\pi(\phi)}} + 2\sqrt{T}.$$

954 Substituting it into [Eq. \(13\)](#) (by picking  $h = h^*$ ), we have  $\text{Reg}(\phi) \leq 3\sqrt{T \log \frac{1}{\pi(\phi)}} + 2\sqrt{T} +$

955  $4\sqrt{T \log d} = \mathcal{O} \left( \sqrt{T \log \frac{1}{\pi(\phi)}} + \sqrt{T \log d} \right)$ . Therefore, [Eq. \(3\)](#) is satisfied with  $B = \sqrt{T \log d}$ .

956 The second statement of the theorem then follows directly from [Theorem 3.3](#). □



## D Omitted Details in Section 6

In this section, we provide the omitted details and proofs for our results in Section 6. The section is organized as follows. In Appendix D.1, we include the pseudocode for OMWU. In Appendix D.2, we introduce several important lemmas that will be useful in our analysis. Then, in Appendix D.3, we provide the full proof for Theorem 6.4. Specifically, we start with a proof sketch, showing how we utilize the nonnegative-social-external-regret property to show that the path-length of the entire learning dynamic is bounded by  $\mathcal{O}(N \log d)$ , followed by a full proof of Theorem 6.4. Importantly, following the notation convention introduced in Section 6, we use superscript  $(n)$  to denote variables associated with agent/player  $n$ .

### D.1 Pseudocode for OMWU

Here, we include the pseudocode for OMWU (Algorithm 9) that is used in Algorithm 4. There are two possible outputs for Algorithm 9 at each round  $t$ . For base learner  $\mathcal{B}_{d+2}$  in Algorithm 4, the output in round  $t$  is  $\phi_t \in \mathbb{R}^{d \times d}$ , while for subroutines used by  $\mathcal{B}_k$  for  $k \in [d+1]$ , the output is  $p_t \in \Delta(d)$ .

---

#### Algorithm 9 OMWU

---

**Input:** learning rate  $\eta > 0$ ; a prior distribution  $\hat{p}_1 \in \Delta(d)$ .

- 1 **Initialize:**  $\ell_0 = \mathbf{0} \in \mathbb{R}^d$ .
  - for**  $t = 1, 2, \dots, T$  **do**
  - 2   Compute  $p_t$  such that  $p_{t,i} \propto \hat{p}_{t,i} \exp(-\eta \ell_{t-1,i})$  for  $i \in [d]$  and  $\phi_t = \mathbf{1} p_t^\top \in \mathbb{R}^{d \times d}$ .
  - 3   Receive  $\ell_t$  and compute  $\hat{p}_{t+1}$  such that  $\hat{p}_{t+1,i} \propto \hat{p}_{t,i} \exp(-\eta \ell_{t,i})$  for  $i \in [d]$ .
- 

### D.2 Auxiliary Lemmas

To analyze the performance of OMWU, we use following lemma from Syrgkanis et al. [2015].

**Lemma D.1** (Theorem 18 in [Syrgkanis et al., 2015]). *OMWU (Algorithm 9) with learning rate  $\eta > 0$  guarantees that*

$$\sum_{t=1}^T \langle p_t - u, \ell_t \rangle \leq \frac{\text{KL}(u, p_1)}{\eta} + \eta \sum_{t=2}^T \|\ell_t - \ell_{t-1}\|_\infty^2 - \frac{1}{8\eta} \sum_{t=2}^T \|p_t - p_{t-1}\|_1^2.$$

The next lemma shows that the loss vector difference between consecutive rounds for each agent  $n$  is bounded by the sum of the strategy differences over all other agents.

**Lemma D.2.** *For any  $t \in [T]$ ,  $n \in [N]$ , we have*

$$\|\ell_t^{(n)} - \ell_{t-1}^{(n)}\|_\infty^2 \leq (N-1) \sum_{j \neq n} \|p_t^{(j)} - p_{t-1}^{(j)}\|_1^2.$$

*Proof.* For any action  $a \in [d]$ :

$$\begin{aligned} |\ell_{t,a}^{(n)} - \ell_{t-1,a}^{(n)}| &= \left| \sum_{\mathbf{a}^{(-n)}} \left( \prod_{j \neq n} p_{t,a_j}^{(j)} - \prod_{j \neq n} p_{t-1,a_j}^{(j)} \right) \cdot \ell^{(n)}(a, \mathbf{a}^{(-n)}) \right| \\ &\leq \sum_{\mathbf{a}^{(-n)}} \left| \prod_{j \neq n} p_{t,a_j}^{(j)} - \prod_{j \neq n} p_{t-1,a_j}^{(j)} \right| \quad (\text{since } |\ell^{(n)}(\mathbf{a})| \leq 1) \\ &\leq \sum_{j \neq n} \sum_{i=1}^d |p_{t,i}^{(j)} - p_{t-1,i}^{(j)}| \\ &= \sum_{j \neq n} \|p_t^{(j)} - p_{t-1}^{(j)}\|_1. \end{aligned}$$

979 Taking square on both sides, we know that

$$\|\ell_t^{(n)} - \ell_{t-1}^{(n)}\|_\infty \leq \left( \sum_{j \neq n} \|p_t^{(j)} - p_{t-1}^{(j)}\|_1 \right)^2 \leq (N-1) \sum_{j \neq n} \|p_t^{(j)} - p_{t-1}^{(j)}\|_1^2.$$

980

□

981 The next lemma shows how the difference between strategies in consecutive rounds is related to the  
982 stability of both the base learners and the meta learner.

983 **Lemma D.3.** Suppose that every agent  $n \in [N]$  applies [Algorithm 4](#), then for all  $t \geq 2$ ,  $n \in [N]$ , we  
984 have

$$\|p_t^{(n)} - p_{t-1}^{(n)}\|_1^2 \leq 2 \sum_{k=1}^{d+2} w_{t,k}^{(n)} \|\tilde{p}_t^{(n),k} - \tilde{p}_{t-1}^{(n),k}\|_1^2 + 2 \|w_t^{(n)} - w_{t-1}^{(n)}\|_1^2,$$

985 where  $\tilde{p}_t^{(n),k} = \phi_t^{(n),k}(p_t^{(n)})$  for each  $k \in [d+2]$ .

986 *Proof.* Direct calculation shows that

$$\begin{aligned} & \|p_t^{(n)} - p_{t-1}^{(n)}\|_1^2 \\ &= \left\| \left( \phi_t^{(n)} \right)^\top p_t^{(n)} - \left( \phi_{t-1}^{(n)} \right)^\top p_{t-1}^{(n)} \right\|_1^2 && (p_t^{(n)} \text{ is stationary distribution of } \phi_t^{(n)}) \\ &= \left\| \left( \sum_{k=1}^{d+2} w_{t,k}^{(n)} \phi_t^{(n),k} \right)^\top p_t^{(n)} - \left( \sum_{k=1}^{d+2} w_{t-1,k}^{(n)} \phi_{t-1}^{(n),k} \right)^\top p_{t-1}^{(n)} \right\|_1^2 && (\text{definition of } \phi_t^{(n)}) \\ &= \left\| \left( \sum_{k=1}^{d+2} w_{t,k}^{(n)} \tilde{p}_t^{(n),k} \right) - \left( \sum_{k=1}^{d+2} w_{t-1,k}^{(n)} \tilde{p}_{t-1}^{(n),k} \right) \right\|_1^2 && (\text{definition of } \tilde{p}_t^{(n),k}) \\ &\leq 2 \left\| \left( \sum_{k=1}^{d+2} w_{t,k}^{(n)} \tilde{p}_t^{(n),k} \right) - \left( \sum_{k=1}^{d+2} w_{t,k}^{(n)} \tilde{p}_{t-1}^{(n),k} \right) \right\|_1^2 + 2 \left\| \left( \sum_{k=1}^{d+2} w_{t,k}^{(n)} \tilde{p}_{t-1}^{(n),k} \right) - \left( \sum_{k=1}^{d+2} w_{t-1,k}^{(n)} \tilde{p}_{t-1}^{(n),k} \right) \right\|_1^2 \\ &\leq 2 \sum_{k=1}^{d+2} w_{t,k}^{(n)} \|\tilde{p}_t^{(n),k} - \tilde{p}_{t-1}^{(n),k}\|_1^2 + 2 \|w_t^{(n)} - w_{t-1}^{(n)}\|_1^2. && (\text{Jensen's inequality}) \end{aligned}$$

987

□

988 The next lemma further bounds the scale of  $\|\tilde{p}_t^{(n),k} - \tilde{p}_{t-1}^{(n),k}\|_1^2$  with respect to the stationary distribution  
989 difference  $\|p_t^{(n)} - p_{t-1}^{(n)}\|_1^2$  and the base learner's decision differences.

990 **Lemma D.4.** For all  $k \in [d+2]$  and  $n \in [N]$ ,  $\|\tilde{p}_t^{(n),k} - \tilde{p}_{t-1}^{(n),k}\|_1^2 \leq 2 \|p_t^{(n)} - p_{t-1}^{(n)}\|_1^2 +$   
991  $2 \sum_{j=1}^d \|\phi_{t,j}^{(n),k} - \phi_{t-1,j}^{(n),k}\|_1^2.$

992 *Proof.* By definition of  $\tilde{p}_t^{(n),k}$ , we can bound  $\|\tilde{p}_t^{(n),k} - \tilde{p}_{t-1}^{(n),k}\|_1^2$  as follows:

$$\begin{aligned} & \|\tilde{p}_t^{(n),k} - \tilde{p}_{t-1}^{(n),k}\|_1^2 \\ &= \left\| (\phi_t^{(n),k})^\top p_t^{(n)} - (\phi_{t-1}^{(n),k})^\top p_{t-1}^{(n)} \right\|_1^2 \\ &\leq 2 \left\| (\phi_t^{(n),k})^\top (p_t^{(n)} - p_{t-1}^{(n)}) \right\|_1^2 + 2 \left\| (\phi_t^{(n),k} - \phi_{t-1}^{(n),k})^\top p_{t-1}^{(n)} \right\|_1^2 \\ &= 2 \left( \sum_{j=1}^d \left| \langle \phi_{t,j}^{(n),k}, p_t^{(n)} - p_{t-1}^{(n)} \rangle \right| \right)^2 + 2 \left( \sum_{j=1}^d \left| \langle \phi_{t,j}^{(n),k} - \phi_{t-1,j}^{(n),k}, p_{t-1}^{(n)} \rangle \right| \right)^2 \end{aligned}$$

$$\begin{aligned}
&= 2 \left( \sum_{j=1}^d \left| \sum_{i=1}^d \phi_{t,ij}^{(n),k} (p_{t,i}^{(n)} - p_{t-1,i}^{(n)}) \right| \right)^2 + 2 \left( \sum_{j=1}^d \left| \sum_{i=1}^d p_{t-1,i}^{(n)} (\phi_{t,ij}^{(n),k} - \phi_{t-1,ij}^{(n),k}) \right| \right)^2 \\
&\leq 2 \left( \sum_{j=1}^d \sum_{i=1}^d \phi_{t,ij}^{(n),k} \left| p_{t,i}^{(n)} - p_{t-1,i}^{(n)} \right| \right)^2 + 2 \left( \sum_{j=1}^d \sum_{i=1}^d p_{t-1,i}^{(n)} \left| \phi_{t,ij}^{(n),k} - \phi_{t-1,ij}^{(n),k} \right| \right)^2 \\
&= 2 \left( \sum_{i=1}^d \left| p_{t,i}^{(n)} - p_{t-1,i}^{(n)} \right| \sum_{j=1}^d \phi_{t,ij}^{(n),k} \right)^2 + 2 \left( \sum_{i=1}^d p_{t-1,i}^{(n)} \left\| \phi_{t,i:}^{(n),k} - \phi_{t-1,i:}^{(n),k} \right\|_1 \right)^2 \\
&= 2 \left\| p_t^{(n)} - p_{t-1}^{(n)} \right\|_1^2 + 2 \left( \sum_{i=1}^d p_{t-1,i}^{(n)} \left\| \phi_{t,i:}^{(n),k} - \phi_{t-1,i:}^{(n),k} \right\|_1 \right)^2 \quad (\text{since } \phi_t^{(n),k} \in \mathcal{S}) \\
&\leq 2 \left\| p_t^{(n)} - p_{t-1}^{(n)} \right\|_1^2 + 2 \sum_{i=1}^d p_{t-1,i}^{(n)} \left\| \phi_{t,i:}^{(n),k} - \phi_{t-1,i:}^{(n),k} \right\|_1^2 \quad (\text{Cauchy-Schwarz inequality}) \\
&\leq 2 \left\| p_t^{(n)} - p_{t-1}^{(n)} \right\|_1^2 + 2 \sum_{i=1}^d \left\| \phi_{t,i:}^{(n),k} - \phi_{t-1,i:}^{(n),k} \right\|_1^2,
\end{aligned}$$

993 which finishes the proof.  $\square$

994 The next lemma shows the multiplicative stability of the meta learner's strategy.

995 **Lemma D.5** (Multiplicative stability lemma). *Suppose that each player runs [Algorithm 4](#) with*  
996  $\eta_m \leq \frac{1}{8(1+4\lambda)}$ , *we have for all  $t \in [T]$ ,  $n \in [N]$ , and  $k \in [d+2]$ ,  $w_{t,k}^{(n)} \in [\frac{1}{2}w_{t-1,k}^{(n)}, 2w_{t-1,k}^{(n)}]$ .*

997 *Proof.* We omit the superscript  $(n)$  for conciseness. By definition of  $\ell_t^w$ ,  $m_t^w$ , and  $c_t$ , we know that  
998  $\max\{\|\ell_t^w + c_t\|_\infty, \|m_t^w + c_t\|_\infty\} \leq 1 + 4\lambda$  for all  $t \in [T]$ . Therefore, according to the update rule  
999 of  $w_t$  and  $\hat{w}_t$ , we know that

$$\begin{aligned}
\exp(-1/8)w_{t,k} &\leq \hat{w}_{t,k} = \frac{w_{t,k} \exp(\eta_m(m_{t,k}^w + c_{t,k}))}{\sum_{i=1}^{d+2} w_{t,i} \exp(\eta_m(m_{t,i}^w + c_{t,i}))} \leq \exp(1/8) \cdot w_{t,k}, \\
\exp(-1/8)\hat{w}_{t-1,k} &\leq \hat{w}_{t,k} = \frac{\hat{w}_{t-1,k} \exp(-\eta_m(\ell_{t-1,k}^w + c_{t-1,k}))}{\sum_{i=1}^{d+2} \hat{w}_{t-1,i} \exp(-\eta_m(m_{t-1,i}^w + c_{t-1,i}))} \leq \exp(1/8) \cdot \hat{w}_{t-1,k}.
\end{aligned}$$

1000 Therefore, we know that  $w_{t,k} \leq \exp(3/8)w_{t-1,k} \leq 2w_{t-1,k}$  and  $w_{t,k} \geq \exp(-3/8)w_{t-1,k} \geq$   
1001  $\frac{1}{2}w_{t-1,k}$ .  $\square$

1002 The next lemma bounds the external regret for the meta learner with respect to an arbitrary distribution  
1003 over the  $d+2$  base learners.

1004 **Lemma D.6** (Meta Regret Bound). *Suppose that all players apply [Algorithm 4](#) with  $\lambda \leq \frac{1}{4\eta_m}$ . Then,*  
1005 *we have*

$$\begin{aligned}
\sum_{t=1}^T \left\langle w_t^{(n)} - u, \ell_t^{(n),w} \right\rangle &\leq \mathcal{O}(\lambda) + \frac{\text{KL}(u, w_1^{(n)})}{\eta_m} + 2\eta_m N \sum_{t=2}^T \sum_{n=1}^N \|p_t^{(n)} - p_{t-1}^{(n)}\|_1^2 \\
&\quad + \lambda \sum_{t=2}^{T-1} \sum_{k=1}^{d+2} u_k \|\tilde{p}_t^{(n),k} - \tilde{p}_{t-1}^{(n),k}\|_1^2 - \frac{\lambda}{4} \sum_{t=2}^T \|p_t^{(n)} - p_{t-1}^{(n)}\|_1^2,
\end{aligned}$$

1006 for all agent  $n \in [N]$  and  $u \in \Delta(d+2)$ .

1007 *Proof.* According to [Lemma D.1](#), we know that for each  $u \in \Delta(d+2)$  and  $n \in [N]$ ,

$$\sum_{t=1}^T \left\langle w_t^{(n)} - u, \ell_t^{(n),w} + c_t^{(n)} \right\rangle$$

$$\begin{aligned}
&\leq \frac{\text{KL}(u, w_1^{(n)})}{\eta_m} + \eta_m \sum_{t=2}^T \|\ell_t^{(n),w} - m_t^{(n),w}\|_\infty^2 - \frac{1}{8\eta_m} \sum_{t=2}^T \|w_t^{(n)} - w_{t-1}^{(n)}\|_1^2 \quad (\text{Lemma D.1}) \\
&= \frac{\text{KL}(u, w_1^{(n)})}{\eta_m} + \eta_m \sum_{t=2}^T \max_{i \in [d+2]} \left| p_t^{(n)\top} \phi_t^{(n),i} \ell_t^{(n)} - p_{t-1}^{(n)\top} \phi_t^{(n),i} \ell_{t-1}^{(n)} \right|^2 - \frac{1}{8\eta_m} \sum_{t=2}^T \|w_t^{(n)} - w_{t-1}^{(n)}\|_1^2 \\
&\leq \frac{\text{KL}(u, w_1^{(n)})}{\eta_m} - \frac{1}{8\eta_m} \sum_{t=2}^T \|w_t^{(n)} - w_{t-1}^{(n)}\|_1^2 \\
&\quad + 2\eta_m \sum_{t=2}^T \max_{k \in [d+2]} \left( \left| \langle p_t^{(n)} - p_{t-1}^{(n)}, \phi_t^{(n),k} \ell_t^{(n)} \rangle \right|^2 + 2 \left| p_{t-1}^{(n)\top} \phi_t^{(n),k} \ell_t^{(n)} - p_{t-1}^{(n)\top} \phi_t^{(n),k} \ell_{t-1}^{(n)} \right|^2 \right) \\
&\leq \frac{\text{KL}(u, w_1^{(n)})}{\eta_m} + \eta_m \sum_{t=2}^T \max_{i \in [d+2]} \left( 2 \left\| p_t^{(n)\top} \phi_t^{(n),i} - p_{t-1}^{(n)\top} \phi_t^{(n),i} \right\|_1^2 + 2 \left\| \ell_t^{(n)} - \ell_{t-1}^{(n)} \right\|_\infty^2 \right) \\
&\quad - \frac{1}{8\eta_m} \sum_{t=2}^T \|w_t^{(n)} - w_{t-1}^{(n)}\|_1^2 \quad (\text{using Hölder's inequality}) \\
&\leq \frac{\text{KL}(u, w_1^{(n)})}{\eta_m} + 2\eta_m(N-1) \sum_{t=2}^T \sum_{n=1}^N \|p_t^{(n)} - p_{t-1}^{(n)}\|_1^2 - \frac{1}{8\eta_m} \sum_{t=2}^T \|w_t^{(n)} - w_{t-1}^{(n)}\|_1^2,
\end{aligned}$$

1008 where the last inequality uses Lemma D.2. Recall the definition  $c_{t,k}^{(n)} = \lambda \|(\phi_{t-1}^{(n),k})^\top p_{t-1}^{(n)} -$   
1009  $(\phi_{t-2}^{(n),k})^\top p_{t-2}^{(n)}\|_1^2 = \lambda \|\tilde{p}_{t-1}^{(n),k} - \tilde{p}_{t-2}^{(n),k}\|_1^2$  for  $t \geq 3$  and  $c_{t,k}^{(n)} = 0$  for  $t \in \{1, 2\}$ , we can further  
1010 upper bound the meta regret as follows:

$$\begin{aligned}
&\sum_{t=1}^T \langle w_t^{(n)} - u, \ell_t^{(n),w} \rangle \\
&\leq \frac{\text{KL}(u, w_1^{(n)})}{\eta_m} + 2\eta_m(N-1) \sum_{t=2}^T \sum_{n=1}^N \|p_t^{(n)} - p_{t-1}^{(n)}\|_1^2 - \frac{1}{8\eta_m} \sum_{t=2}^T \|w_t^{(n)} - w_{t-1}^{(n)}\|_1^2 \\
&\quad - \lambda \sum_{t=3}^T \sum_{k=1}^{d+2} w_{t,k}^{(n)} \|\tilde{p}_{t-1}^{(n),k} - \tilde{p}_{t-2}^{(n),k}\|_1^2 + \lambda \sum_{t=3}^T \sum_{k=1}^{d+2} u_k \|\tilde{p}_{t-1}^{(n),k} - \tilde{p}_{t-2}^{(n),k}\|_1^2 \\
&\leq \frac{\text{KL}(u, w_1^{(n)})}{\eta_m} + 2\eta_m N \sum_{t=2}^T \sum_{n=1}^N \|p_t^{(n)} - p_{t-1}^{(n)}\|_1^2 + \lambda \sum_{t=3}^T \sum_{k=1}^{d+2} u_k \|\tilde{p}_{t-1}^{(n),k} - \tilde{p}_{t-2}^{(n),k}\|_1^2 \\
&\quad - \frac{1}{8\eta_m} \sum_{t=2}^T \|w_t^{(n)} - w_{t-1}^{(n)}\|_1^2 - \frac{\lambda}{2} \sum_{t=3}^T \sum_{k=1}^{d+2} w_{t-1,k}^{(n)} \|\tilde{p}_{t-1}^{(n),k} - \tilde{p}_{t-2}^{(n),k}\|_1^2 \\
&\quad \quad \quad (w_{t-1,k}^{(n)} \leq 2w_{t,k}^{(n)} \text{ using Lemma D.5}) \\
&= \mathcal{O}(\lambda) + \frac{\text{KL}(u, w_1^{(n)})}{\eta_m} + 2\eta_m N \sum_{t=2}^T \sum_{n=1}^N \|p_t^{(n)} - p_{t-1}^{(n)}\|_1^2 + \lambda \sum_{t=3}^T \sum_{k=1}^{d+2} u_k \|\tilde{p}_{t-1}^{(n),k} - \tilde{p}_{t-2}^{(n),k}\|_1^2 \\
&\quad - \frac{1}{8\eta_m} \sum_{t=2}^T \|w_t^{(n)} - w_{t-1}^{(n)}\|_1^2 - \frac{\lambda}{2} \sum_{t=2}^T \sum_{k=1}^{d+2} w_{t,k}^{(n)} \|\tilde{p}_t^{(n),k} - \tilde{p}_{t-1}^{(n),k}\|_1^2 \\
&\leq \mathcal{O}(\lambda) + \frac{\text{KL}(u, w_1^{(n)})}{\eta_m} + 2\eta_m N \sum_{t=2}^T \sum_{n=1}^N \|p_t^{(n)} - p_{t-1}^{(n)}\|_1^2 + \lambda \sum_{t=3}^T \sum_{k=1}^{d+2} u_k \|\tilde{p}_{t-1}^{(n),k} - \tilde{p}_{t-2}^{(n),k}\|_1^2 \\
&\quad - \min \left\{ \frac{1}{16\eta_m}, \frac{\lambda}{4} \right\} \sum_{t=2}^T \|p_t^{(n)} - p_{t-1}^{(n)}\|_1^2 \quad (\text{using Lemma D.3}) \\
&\leq \mathcal{O}(\lambda) + \frac{\text{KL}(u, w_1^{(n)})}{\eta_m} + 2\eta_m N \sum_{t=2}^T \sum_{n=1}^N \|p_t^{(n)} - p_{t-1}^{(n)}\|_1^2
\end{aligned}$$

$$+ \lambda \sum_{t=2}^{T-1} \sum_{k=1}^{d+2} u_k \|\tilde{p}_t^{(n),k} - \tilde{p}_{t-1}^{(n),k}\|_1^2 - \frac{\lambda}{4} \sum_{t=2}^T \|p_t^{(n)} - p_{t-1}^{(n)}\|_1^2, \quad (14)$$

1011 where the last inequality uses the condition that  $\lambda \leq \frac{1}{4\eta_m}$ .  $\square$

### 1012 D.3 Main Proofs in Section 6

1013 In this section, we provide the proof for [Theorem 6.4](#). Before showing the proof, we first provide an  
1014 outline to highlight the technical novelties in proving [Theorem 6.4](#).

#### 1015 D.3.1 Proof Outline

1016 As shown in previous literature (e.g. [Anagnostides et al. \[2022b\]](#), [Zhang et al. \[2022\]](#)), in order to  
1017 show fast convergence, the key is to control the stability of the strategies between consecutive rounds.  
1018 [Anagnostides et al. \[2022b\]](#) use log-barrier regularized online mirror descent to control the sum of  
1019 the squared path-length between consecutive rounds over the horizon and all the players. However,  
1020 due to the use of log-barrier regularizer, the obtained bound  $\mathcal{O}(Nd^3 \log T)$  suffers from a larger  
1021 polynomial dependency of  $d$  and  $\log T$ . Somewhat surprisingly, we show in the following theorem  
1022 that if the game satisfies [Definition 6.3](#), [Algorithm 4](#) (with entropy regularizer) achieves a tighter  
1023  $\mathcal{O}(N \log d)$  bound.

1024 **Theorem D.7.** *If each player  $n \in [N]$  applies [Algorithm 4](#) with  $\eta_m = \frac{1}{64N}$  and  $\lambda = N$ , then we*  
1025 *have*

$$\sum_{t=2}^T \sum_{n=1}^N \|p_t^{(n)} - p_{t-1}^{(n)}\|_1^2 \leq \mathcal{O}(N \log d).$$

1026 We provide a proof sketch for [Theorem D.7](#) (with full proof deferred to [Appendix D.3.2](#)) and see why  
1027 our modifications to both the meta learner and the base learners are crucial to achieve this. To prove  
1028 [Theorem D.7](#), we consider the each player  $n$ 's external regret, which can be decomposed as the meta  
1029 learner regret with respect to  $\mathcal{B}_{d+2}$  plus  $\mathcal{B}_{d+2}$ 's external regret:

$$\text{Reg}_n^{\text{Ext}}(u) = \underbrace{\sum_{t=1}^T \langle w_t^{(n)} - e_{d+2}, \ell_t^{(n),w} \rangle}_{\text{META-REGRET}} + \underbrace{\sum_{t=1}^T \langle \phi_t^{(n),d+2} - \mathbf{1} u^\top, p_t^{(n)} \ell_t^{(n)\top} \rangle}_{\text{BASE-REGRET}}.$$

1030 Applying [Lemma D.1](#), [Lemma D.6](#), and some direct calculations, we can show that META-  
1031 REGRET and BASE-REGRET are bounded as follows:

$$\begin{aligned} \text{META-REGRET} &\leq \mathcal{O}(\lambda) + \frac{\text{KL}(e_{d+2}, w_1^{(n)})}{\eta_m} + 2\eta_m N \sum_{t=2}^T \sum_{n=1}^N \|p_t^{(n)} - p_{t-1}^{(n)}\|_1^2 \\ &\quad + \lambda \sum_{t=2}^{T-1} \|\tilde{p}_t^{(n),d+2} - \tilde{p}_{t-1}^{(n),d+2}\|_1^2 - \frac{\lambda}{4} \sum_{t=2}^T \|p_t^{(n)} - p_{t-1}^{(n)}\|_1^2 \end{aligned} \quad (15)$$

$$\text{BASE-REGRET} \leq \frac{\log d}{\eta} + \eta \sum_{t=2}^T \|\ell_t^{(n)} - \ell_{t-1}^{(n)}\|_\infty^2 - \frac{1}{8\eta} \sum_{t=2}^T \|\tilde{p}_t^{(n),d+2} - \tilde{p}_{t-1}^{(n),d+2}\|_1^2, \quad (16)$$

1032 where [Eq. \(16\)](#) uses the fact that  $\phi_t^{(n),d+2} = \mathbf{1} \tilde{p}_t^{(n),d+2\top}$ . According to [Lemma D.2](#), we can further  
1033 upper bound both  $\|\ell_t^{(n)} - \ell_{t-1}^{(n)}\|_\infty^2$  by  $\mathcal{O}(N \sum_{n=1}^N \|p_t^{(n)} - p_{t-1}^{(n)}\|_1^2)$ . Now, we see the importance of  
1034 including correction terms in the meta-algorithm. Without  $c_t^{(n)}$ , the two negative term in [Eq. \(16\)](#)  
1035 is *not enough* to cancel the above positive term. Thanks to the correction term, we are able to  
1036 cancel the positive term  $\mathcal{O}((\eta_m + \eta)N \sum_{t=2}^T \sum_{n=1}^N \|p_t^{(n)} - p_{t-1}^{(n)}\|_1^2)$  by using half of the negative  
1037 term  $-\frac{\lambda}{8} \sum_{t=1}^T \|p_t^{(n)} - p_{t-1}^{(n)}\|_1^2$ , taking a summation over  $n \in [N]$ , and picking  $\lambda$ ,  $\eta_m$ , and  $\eta$   
1038 appropriately. Moreover, the positive term induced by the correction can be canceled by the negative  
1039 term in [Eq. \(16\)](#). Therefore, summing over BASE-REGRET and META-REGRET for all  $n \in [N]$  with  
1040  $\eta_m = \Theta(1/N)$ ,  $\eta = \Theta(1/N)$ , and  $\lambda = N$ , we can obtain that  $\sum_{n=1}^N \text{Reg}_n^{\text{Ext}} \leq \mathcal{O}(N^2 \log d) -$

1041  $\Omega(N \sum_{n=1}^N \sum_{t=2}^T \|p_t^{(n)} - p_{t-1}^{(n)}\|_1^2)$ . Further using the property that  $\sum_{n=1}^N \text{Reg}_n^{\text{Ext}} \geq 0$  finish the  
 1042 proof.

1043 Note that the above proof sketch indeed also proves an  $\mathcal{O}(N \log d)$  external regret for each individual  
 1044 player. To obtain comparator-adaptive  $\Phi$ -regret, we first consider  $\phi \in \Phi_b$  and obtain  $\mathcal{O}(c_\phi \log d +$   
 1045  $N^2 \log d)$  by picking the meta learner's comparator  $u \in \Delta(d+2)$  to be a distribution based on  $\phi$ .  
 1046 Then, the final result is achieved by taking a convex combination of the bound.

### 1047 D.3.2 Proof of Theorem D.7

1048 In this section, we provide a detailed proof for Theorem D.7.

1049 *Proof of Theorem D.7.* Fix  $n \in [N]$  and consider the base-regret and the meta-regret for agent  $n$  with  
 1050 respect to the base algorithm  $\mathcal{A}_{d+2}$ , which is Algorithm 9 handling the external regret. According  
 1051 to the construction of  $\phi_t^{(n),d+2}$ , we have  $\phi_{t,i}^{(n),d+2} = \tilde{p}_t^{(n),d+2}$  for all  $i \in [d]$ , meaning that  $\tilde{p}_t^{(n),d+2}$   
 1052 equals to the decision made by  $\mathcal{A}_{d+2}$  at round  $t$ . Therefore, using Lemma D.1, the base regret of  
 1053  $\mathcal{A}_{d+2}$  with respect to  $u \in \Delta(d)$  is bounded as follows:

$$\begin{aligned} \sum_{t=1}^T \langle \tilde{p}_{t,1}^{(n)} - u, \ell_t^{(n)} \rangle &\leq \frac{\log d}{\eta} + \eta \sum_{t=2}^T \|\ell_t^{(n)} - \ell_{t-1}^{(n)}\|_\infty^2 - \frac{1}{8\eta} \sum_{t=2}^T \|\tilde{p}_{t,1}^{(n)} - \tilde{p}_{t-1,1}^{(n)}\|_1^2 \\ &\leq \frac{\log d}{\eta} + \eta(N-1) \sum_{t=2}^T \sum_{j \neq n} \|p_t^{(j)} - p_{t-1}^{(j)}\|_1^2 - \frac{1}{8\eta} \sum_{t=2}^T \|\tilde{p}_{t,1}^{(n)} - \tilde{p}_{t-1,1}^{(n)}\|_1^2. \end{aligned} \quad (17)$$

1054 As for meta-regret, applying Lemma D.6 with  $u = e_{d+2}$  and noticing that  $w_{1,d+2}^{(n)} = \frac{1}{4}$ , we have

$$\begin{aligned} \sum_{t=1}^T \langle w_t^{(n)} - e_{d+2}, \ell_t^{(n),w} \rangle &\leq \mathcal{O}(\lambda) + \frac{\log 4}{\eta_m} + 2\eta_m N \sum_{t=2}^T \sum_{n=1}^N \|p_t^{(n)} - p_{t-1}^{(n)}\|_1^2 \\ &\quad + \lambda \sum_{t=2}^{T-1} \|\tilde{p}_{t,1}^{(n)} - \tilde{p}_{t-1,1}^{(n)}\|_1^2 - \frac{\lambda}{4} \sum_{t=2}^T \|p_t^{(n)} - p_{t-1}^{(n)}\|_1^2. \end{aligned} \quad (18)$$

1055 Summing up Eq. (17) and Eq. (18), we can bound the external regret for player  $n$  as follows:

$$\begin{aligned} \text{Reg}_n^{\text{Ext}} &= \sum_{t=1}^T \langle p_t^{(n)} - u, \ell_t^{(n)} \rangle \\ &\leq \mathcal{O}(\lambda) + \frac{\log 4}{\eta_m} + \frac{\log d}{\eta} + (2\eta_m + \eta)N \sum_{t=2}^T \sum_{n=1}^N \|p_t^{(n)} - p_{t-1}^{(n)}\|_1^2 \\ &\quad + \lambda \sum_{t=2}^{T-1} \|\tilde{p}_t^{(n),d+2} - \tilde{p}_{t-1}^{(n),d+2}\|_1^2 - \frac{1}{8\eta} \sum_{t=2}^T \|\tilde{p}_t^{(n),d+2} - \tilde{p}_{t-1}^{(n),d+2}\|_1^2 - \frac{\lambda}{4} \sum_{t=2}^T \|p_t^{(n)} - p_{t-1}^{(n)}\|_1^2 \\ &\leq \mathcal{O}(\lambda) + \frac{\log 4}{\eta_m} + \frac{\log d}{\eta} + (2\eta_m + \eta)N \sum_{t=2}^T \sum_{n=1}^N \|p_t^{(n)} - p_{t-1}^{(n)}\|_1^2 - \frac{\lambda}{4} \sum_{t=2}^T \|p_t^{(n)} - p_{t-1}^{(n)}\|_1^2, \end{aligned} \quad (19)$$

1056 where the last inequality uses  $\lambda = N \leq \frac{1}{8\eta} = 2N$ . Taking summation over  $n \in [N]$  and using  
 1057 Definition 6.3 that  $\sum_{n=1}^N \text{Reg}_n^{\text{Ext}} \geq 0$ , we know that

$$\begin{aligned} 0 &\leq \sum_{n=1}^N \text{Reg}_n^{\text{Ext}} \\ &\leq \mathcal{O}(N\lambda) + \frac{N \log 4}{\eta_m} + \frac{N \log d}{\eta} + \left( (2\eta_m + \eta)N^2 - \frac{\lambda}{4} \right) \sum_{t=2}^T \sum_{n=1}^N \|p_t^{(n)} - p_{t-1}^{(n)}\|_1^2. \end{aligned}$$

1058 According to the choice of  $\lambda$ , we know that  $\frac{\lambda}{8} = \frac{N}{8} \geq \frac{3N}{32} = (2\eta_m + \eta)N^2$ . Rearranging the terms  
 1059 gives

$$\frac{N}{8} \sum_{t=2}^T \sum_{n=1}^N \|p_t^{(n)} - p_{t-1}^{(n)}\|_1^2 \leq \mathcal{O}(N^2 \log d),$$

1060 which finishes the proof.  $\square$

### 1061 D.3.3 Proof of Theorem 6.4

1062 Now we prove our main results Theorem 6.4 for multi-agent games. Specifically, we split the proof  
 1063 into three parts and first prove the external regret guarantee.

1064 **Theorem D.8.** Suppose that all agents run Algorithm 4 with  $\lambda = N$ ,  $\eta_m = \frac{1}{64N}$ . Then, we have  
 1065  $\text{Reg}_n^{\text{Ext}} \leq \mathcal{O}(N \log d)$ .

1066 *Proof.* According to Eq. (19), we know that

$$\begin{aligned} \text{Reg}_n &\leq \mathcal{O}(\lambda) + \frac{\log 4}{\eta_m} + \frac{\log d}{\eta} + (2\eta_m + \eta)N \sum_{t=2}^T \sum_{n=1}^N \|p_t^{(n)} - p_{t-1}^{(n)}\|_1^2 \\ &\leq \mathcal{O}(N + N \log d) + \mathcal{O}\left(\sum_{t=2}^T \sum_{n=1}^N \|p_t^{(n)} - p_{t-1}^{(n)}\|_1^2\right) \\ &\leq \mathcal{O}(N \log d), \end{aligned}$$

1067 where the second inequality is due to the choice of  $\eta_m$ ,  $\eta$ , and the final inequality is due to Theo-  
 1068 rem D.7.  $\square$

1069 Next, we prove our results for  $\Phi$ -regret. As we sketched in Appendix D.3.1, we first prove our results  
 1070 for binary transformation matrices  $\phi \in \Phi_b$ . First, the following theorem shows that our algorithm  
 1071 achieves  $\text{Reg}_n(\phi) = \mathcal{O}(N(d - d_\phi^{\text{self}}) \log d + N^2 \log d)$  for all  $\phi \in \Phi_b$ .

1072 **Theorem D.9.** Suppose that all agents run Algorithm 4 with  $\lambda = N$ ,  $\eta_m = \frac{1}{64N}$ . Then, we have  
 1073  $\text{Reg}_n(\phi) \leq \mathcal{O}((d - d_\phi^{\text{self}})N \log d + N^2 \log d)$  for all  $\phi \in \Phi_b$ .

1074 *Proof.* To achieve  $\text{Reg}_n(\phi) \leq \mathcal{O}(N(d - d_\phi^{\text{self}}) \log d + N^2 \log d)$ , we consider the regret with respect  
 1075 to base algorithm  $\mathcal{A}_{d+1}$ . According to Lemma D.6 and Lemma D.4, we bound the meta-regret as  
 1076 follows:

$$\begin{aligned} &\sum_{t=1}^T \left\langle w_t^{(n)} - e_{d+1}, \ell_t^{(n),w} \right\rangle \\ &\leq \mathcal{O}(\lambda) + \frac{\log 4}{\eta_m} + 2\eta_m N \sum_{t=2}^T \sum_{n=1}^N \|p_t^{(n)} - p_{t-1}^{(n)}\|_1^2 + \lambda \sum_{t=2}^{T-1} \|\tilde{p}_{t,i}^{(n)} - \tilde{p}_{t-1,i}^{(n)}\|_1^2 - \frac{\lambda}{4} \sum_{t=1}^T \|p_t^{(n)} - p_{t-1}^{(n)}\|_1^2 \\ &\leq \mathcal{O}(\lambda) + \frac{\log 4}{\eta_m} + 2\eta_m N \sum_{t=2}^T \sum_{n=1}^N \|p_t^{(n)} - p_{t-1}^{(n)}\|_1^2 + 2\lambda \sum_{t=2}^{T-1} \|p_t^{(n)} - p_{t-1}^{(n)}\|_1^2 \\ &\quad + 2\lambda \sum_{j=1}^d \sum_{t=2}^{T-1} \|\phi_{t,j}^{(n),d+1} - \phi_{t-1,j}^{(n),d+1}\|_1^2, \end{aligned}$$

1077 where the second inequality uses Lemma D.4. According to the analysis similar to Theorem C.1, we  
 1078 know that base-regret of  $\mathcal{A}_{d+1}$  can be bounded as follows:

$$\begin{aligned} &\sum_{t=1}^T \left\langle \phi_t^{(n),d+1} - \phi, p_t^{(n)} \ell_t^{(n)\top} \right\rangle \\ &= \sum_{t=1}^T \sum_{i=1}^d \left\langle \phi_{t,i}^{(n),d+2} - \phi(e_i), p_{t,i}^{(n)} \cdot \ell_t^{(n)} \right\rangle \end{aligned}$$



$$\begin{aligned}
&\leq \sum_{i=1}^d \left( \frac{\text{KL}(\phi(e_i), \psi_{i:}^{d+1})}{\eta} + \eta \sum_{t=1}^T \left\| p_{t,i}^{(n)} \cdot \ell_t^{(n)} - p_{t-1,i}^{(n)} \cdot \ell_{t-1}^{(n)} \right\|_\infty^2 - \frac{1}{8\eta} \sum_{t=1}^T \left\| \phi_{t,i:}^{(n),d+1} - \phi_{t-1,i:}^{(n),d+1} \right\|_1^2 \right) \\
&\quad \text{(using Lemma D.1)} \\
&= \frac{\log \frac{1}{\pi_{\psi^{d+1}}(\phi)}}{\eta} - \frac{1}{8\eta} \sum_{i=1}^d \sum_{t=1}^T \left\| \phi_{t,i:}^{(n),d+1} - \phi_{t-1,i:}^{(n),d+1} \right\|_1^2 \\
&\quad + \eta \sum_{i=1}^d \sum_{t=1}^T \left\| p_{t,i}^{(n)} \cdot \ell_t^{(n)} - p_{t-1,i}^{(n)} \cdot \ell_{t-1}^{(n)} \right\|_\infty^2 \\
&\leq \frac{2(d - d_\phi^{\text{self}}) \log d + 1}{\eta} - \frac{1}{8\eta} \sum_{t=1}^T \sum_{i=1}^d \left\| \phi_{t,i:}^{(n),d+1} - \phi_{t-1,i:}^{(n),d+1} \right\|_1^2 \quad \text{(according to Eq. (4))} \\
&\quad + 2\eta \sum_{t=1}^T \sum_{i=1}^d \left( \left\| p_{t,i}^{(n)} \cdot \ell_t^{(n)} - p_{t,i}^{(n)} \cdot \ell_{t-1}^{(n)} \right\|_\infty^2 + \left\| p_{t,i}^{(n)} \cdot \ell_{t-1}^{(n)} - p_{t-1,i}^{(n)} \cdot \ell_{t-1}^{(n)} \right\|_\infty^2 \right) \\
&\leq \frac{2(d - d_\phi^{\text{self}}) \log d + 1}{\eta} - \frac{1}{8\eta} \sum_{t=1}^T \sum_{i=1}^d \left\| \phi_{t,i:}^{(n),d+1} - \phi_{t-1,i:}^{(n),d+1} \right\|_1^2 \\
&\quad + 2\eta \sum_{t=1}^T \sum_{i=1}^d \left( p_{t,i}^{(n)^2} \left\| \ell_t^{(n)} - \ell_{t-1}^{(n)} \right\|_\infty^2 + \left| p_{t,i}^{(n)} - p_{t-1,i}^{(n)} \right|^2 \right) \\
&\leq \frac{2(d - d_\phi^{\text{self}}) \log d + 1}{\eta} - \frac{1}{8\eta} \sum_{t=1}^T \sum_{i=1}^d \left\| \phi_{t,i:}^{(n),d+1} - \phi_{t-1,i:}^{(n),d+1} \right\|_1^2 \\
&\quad + 2\eta \sum_{t=1}^T \left( \left\| \ell_t^{(n)} - \ell_{t-1}^{(n)} \right\|_\infty^2 + \left\| p_t^{(n)} - p_{t-1}^{(n)} \right\|_1^2 \right) \\
&\leq \frac{2(d - d_\phi^{\text{self}}) \log d + 1}{\eta} - \frac{1}{8\eta} \sum_{t=1}^T \sum_{i=1}^d \left\| \phi_{t,i:}^{(n),d+1} - \phi_{t-1,i:}^{(n),d+1} \right\|_1^2 \\
&\quad + 2\eta(N-1) \sum_{t=2}^T \sum_{j \neq n} \left\| p_t^{(j)} - p_{t-1}^{(j)} \right\|_1^2 + 2\eta \sum_{t=1}^T \left\| p_t^{(n)} - p_{t-1}^{(n)} \right\|_1^2. \quad \text{(using Lemma D.2)}
\end{aligned}$$

1079 Summing up the base-regret and meta-regret, we can obtain that

$$\begin{aligned}
&\sum_{t=1}^T \left\langle \phi_t - \phi, p_t^{(n)} \ell_t^{(n)\top} \right\rangle \\
&\leq \mathcal{O}(\lambda) + \frac{\log 4}{\eta_m} + 2\eta_m N \sum_{t=2}^T \sum_{n=1}^N \left\| p_t^{(n)} - p_{t-1}^{(n)} \right\|_1^2 + 2\lambda \sum_{t=2}^{T-1} \left\| p_t^{(n)} - p_{t-1}^{(n)} \right\|_1^2 \\
&\quad + 2\lambda \sum_{j=1}^d \sum_{t=2}^{T-1} \left\| \phi_{t,j:}^{(n),d+1} - \phi_{t-1,j:}^{(n),d+1} \right\|_1^2 \\
&\quad + \frac{2(d - d_\phi^{\text{self}}) \log d + 1}{\eta} - \frac{1}{8\eta} \sum_{t=2}^T \sum_{i=1}^d \left\| \phi_{t,i:}^{(n),d+1} - \phi_{t-1,i:}^{(n),d+1} \right\|_1^2 \\
&\quad + 2\eta(N-1) \sum_{t=2}^T \sum_{j \neq n} \left\| p_t^{(j)} - p_{t-1}^{(j)} \right\|_1^2 + 2\eta \sum_{t=2}^T \left\| p_t^{(n)} - p_{t-1}^{(n)} \right\|_1^2 \\
&\leq \mathcal{O}(\lambda) + \frac{\log 4}{\eta_m} + \frac{2(d - d_\phi^{\text{self}}) \log d + 1}{\eta} \\
&\quad + (2\eta_m N + 2\eta N + \lambda) \sum_{t=2}^T \sum_{j=1}^N \left\| p_t^{(j)} - p_{t-1}^{(j)} \right\|_1^2. \quad \text{(since } 2\lambda = 2N \leq \frac{1}{8\eta} \text{)}
\end{aligned}$$

1080 Since  $\lambda = N$ ,  $\eta_m = \frac{1}{64N}$  and  $\eta = \frac{1}{16N}$  and using [Theorem D.7](#), we know that

$$\sum_{t=1}^T \left\langle \phi_t - \phi, p_t^{(n)} \ell_t^{(n)\top} \right\rangle \leq \mathcal{O} \left( N(d - d_\phi^{\text{self}}) \log d + N^2 \log d \right).$$

1081

□

1082 Next, we prove our second bound with respect to  $d - d_\phi^{\text{unif}} + 1$ .

1083 **Theorem D.10.** Suppose that all agents run [Algorithm 4](#) with  $\lambda = N$ ,  $\eta_m = \frac{1}{64N}$ . Then, we have  
 1084  $\text{Reg}_n(\phi) \leq \mathcal{O}((d - d_\phi^{\text{unif}} + 1)N \log d + N^2 \log d)$  for all  $\phi \in \Phi_b$ .

1085 *Proof.* Given  $\phi \in \Phi_b$ , suppose that the most frequent element in  $\{\phi(e_1), \dots, \phi(e_d)\}$  is  $e_{i_0}$  for some  
 1086  $i_0 \in [d]$ . According to the definition of  $d_\phi^{\text{unif}}$ , we know that there exists  $d_\phi^{\text{unif}}$  number of  $i \in [d]$  such  
 1087 that  $\phi(e_i) = e_{i_0}$ . To bound  $\text{Reg}_n(\phi)$ , we compare to the base-learner  $\mathcal{A}_{i_0}$ . Applying [Lemma D.6](#)  
 1088 gives us

$$\begin{aligned} & \sum_{t=1}^T \left\langle w_t^{(n)} - e_{i_0}, \ell_t^{(n),w} \right\rangle \\ & \leq \mathcal{O}(\lambda) + \frac{\log 4d}{\eta_m} + 2\eta_m N \sum_{t=2}^T \sum_{n=1}^N \|p_t^{(n)} - p_{t-1}^{(n)}\|_1^2 + \lambda \sum_{t=2}^{T-1} \|\tilde{p}_t^{(n),i_0} - \tilde{p}_{t-1}^{(n),i_0}\|_1^2 \\ & \quad - \frac{\lambda}{4} \sum_{t=1}^T \|p_t^{(n)} - p_{t-1}^{(n)}\|_1^2 \\ & \leq \mathcal{O}(\lambda) + \frac{\log 4d}{\eta_m} + 2\eta_m N \sum_{t=2}^T \sum_{n=1}^N \|p_t^{(n)} - p_{t-1}^{(n)}\|_1^2 + 2\lambda \sum_{t=2}^{T-1} \|p_t^{(n)} - p_{t-1}^{(n)}\|_1^2 \\ & \quad + 2\lambda \sum_{j=1}^d \sum_{t=2}^{T-1} \|\phi_{t,j}^{(n),i_0} - \phi_{t-1,j}^{(n),i_0}\|_1^2, \end{aligned}$$

1089 where the second inequality is because [Lemma D.4](#). Now we analyze the base-algorithm performance  
 1090 of  $\text{Alg}_{i_0}$  against  $\phi$ :

$$\begin{aligned} & \sum_{t=1}^T \left\langle \phi_t^{(n),i_0} - \phi, p_t^{(n)} \ell_t^{(n)\top} \right\rangle \\ & = \sum_{t=1}^T \sum_{i=1}^d \left\langle \phi_{t,i}^{(n),i_0} - \phi(e_i), p_{t,i}^{(n)} \cdot \ell_t^{(n)} \right\rangle \\ & \leq \sum_{i=1}^d \left( \frac{\text{KL}(\phi(e_i), \psi_{i_0}^{i_0})}{\eta} + \eta \sum_{t=1}^T \|p_{t,i}^{(n)} \cdot \ell_t^{(n)} - p_{t-1,i}^{(n)} \cdot \ell_{t-1}^{(n)}\|_\infty^2 - \frac{1}{8\eta} \sum_{t=1}^T \|\phi_{t,i}^{(n),i_0} - \phi_{t-1,i}^{(n),i_0}\|_1^2 \right) \\ & \leq \frac{\log \frac{1}{\pi_{\psi_{i_0}(\phi)}}}{\eta} - \frac{1}{8\eta} \sum_{t=1}^T \sum_{i=1}^d \|\phi_{t,i}^{(n),i_0} - \phi_{t-1,i}^{(n),i_0}\|_1^2 + 2\eta \sum_{t=1}^T \left( \|\ell_t^{(n)} - \ell_{t-1}^{(n)}\|_\infty^2 + \|p_t^{(n)} - p_{t-1}^{(n)}\|_1^2 \right) \\ & \leq \frac{2(d - d_\phi^{\text{unif}}) \log d + 1}{\eta} - \frac{1}{8\eta} \sum_{t=1}^T \sum_{i=1}^d \|\phi_{t,i}^{(n),i_0} - \phi_{t-1,i}^{(n),i_0}\|_1^2 \quad (\text{according to Eq. (5)}) \\ & \quad + 2\eta \sum_{t=1}^T \left( \|\ell_t^{(n)} - \ell_{t-1}^{(n)}\|_\infty^2 + \|p_t^{(n)} - p_{t-1}^{(n)}\|_1^2 \right) \\ & \leq \frac{2(d - d_\phi^{\text{unif}}) \log d + 1}{\eta} - \frac{1}{8\eta} \sum_{t=1}^T \sum_{i=1}^d \|\phi_{t,i}^{(n),i_0} - \phi_{t-1,i}^{(n),i_0}\|_1^2 \end{aligned}$$

$$+ 2\eta(N-1) \sum_{t=2}^T \sum_{i \neq n} \left\| p_t^{(i)} - p_{t-1}^{(i)} \right\|_1^2 + 2\eta \sum_{t=1}^T \left\| p_t^{(n)} - p_{t-1}^{(n)} \right\|_1^2. \quad (\text{using Lemma D.2})$$

1091 Summing up the meta-regret and the base-regret, we can obtain that

$$\begin{aligned} \text{Reg}_n(\phi) &= \sum_{t=1}^T \left\langle w_t^{(n)} - u, \ell_t^{(n),w} \right\rangle + \sum_{t=1}^T \left\langle \phi_t^{(n),i_0} - \phi, p_t^{(n)} \ell_t^{(n)\top} \right\rangle \\ &\leq \mathcal{O}(\lambda) + \frac{\log 4d}{\eta_m} + 2\eta_m N \sum_{t=2}^T \sum_{n=1}^N \left\| p_t^{(n)} - p_{t-1}^{(n)} \right\|_1^2 + 2\lambda \sum_{t=2}^{T-1} \left\| p_t^{(n)} - p_{t-1}^{(n)} \right\|_1^2 \\ &\quad + 2\lambda \sum_{i=1}^d \sum_{t=2}^{T-1} \left\| \phi_{t,i}^{(n),i_0} - \phi_{t-1,i}^{(n),i_0} \right\|_1^2 \\ &\quad + \frac{2(d - d_\phi^{\text{unif}}) \log d + 1}{\eta} - \frac{1}{8\eta} \sum_{t=2}^T \sum_{i=1}^d \left\| \phi_{t,i}^{(n),i_0} - \phi_{t-1,i}^{(n),i_0} \right\|_1^2 \\ &\quad + 2\eta(N-1) \sum_{t=2}^T \sum_{j \neq n} \left\| p_t^{(j)} - p_{t-1}^{(j)} \right\|_1^2 + 2\eta \sum_{t=2}^T \left\| p_t^{(n)} - p_{t-1}^{(n)} \right\|_1^2 \\ &= \mathcal{O}(\lambda) + \frac{\log 4}{\eta_m} + \frac{2(d - d_\phi^{\text{unif}}) \log d + 1}{\eta} \\ &\quad + (2\eta_m N + 2\eta N + \lambda) \sum_{t=2}^T \sum_{j=1}^N \left\| p_t^{(j)} - p_{t-1}^{(j)} \right\|_1^2. \quad (\text{since } 2\lambda = 2N \leq \frac{1}{8\eta}) \\ &\leq \mathcal{O}(N(d - d_\phi^{\text{unif}} + 1) \log d + N^2 \log d), \end{aligned}$$

1092 where the last inequality is by picking  $\eta = \frac{1}{16N}$  and using Theorem D.7.  $\square$

1093 Finally, we are ready to prove Theorem 6.4 by combining Theorem D.9 and Theorem D.10.

1094 *Proof of Theorem 6.4.* Combining Theorem D.9 and Theorem D.10, we know that for any  $\phi \in \Phi_b$ ,

$$\text{Reg}_n(\phi) \leq (c_\phi N \log d + N^2 \log d).$$

1095 Then, for  $\phi \in \mathcal{S}$ , define  $q_\phi = \arg\min_{q \in Q_\phi} \mathbb{E}_{\phi' \sim q} [c_{\phi'}]$ . Then, we know that  $c_\phi = \mathbb{E}_{\phi' \sim q_\phi} [c_{\phi'}]$  and

$$\text{Reg}_n(\phi) = \mathbb{E}_{\phi' \sim q_\phi} [\text{Reg}_n(\phi')] \leq \mathcal{O}(\mathbb{E}_{\phi' \sim q_\phi} [c_{\phi'}] N \log d + N^2 \log d) \leq \mathcal{O}(c_\phi N \log d + N^2 \log d).$$

1096 Combining the above with Theorem D.8 finishes the proof.  $\square$
